# Supplementary material for: Electrochemical synthesis of some 2-aminobenzofuran-3-carbonitrile and 2-aminobenzofuran-3-carboxylate derivatives: product diversity by changing the applied current density
Source: Royal Society of Chemistry journal article supplement (doi:10.1039/c8nj02486c), 2018-01-01
Supplement: c8nj02486c1.pdf [file c8nj02486c1.pdf]

## Supplementary Information for

### Electrochemical synthesis of some 2-aminobenzofuran-3-carbonitrile and 2-aminobenzofuran-3-carboxylate derivatives: Product diversity by changing the applied current density †

Mahnaz Sharafi-kolkeshvandi\*, Davood Nematollahi, Firozeh Pouladi and Pouria Patoghi

Faculty of Chemistry, Bu-Ali Sina University, Hamedan, Iran, Zip Code: 65178-38683.

Fax: +98-813-8257407

E-mail: [Mahnaz\\_sharafy@yahoo.com](mailto:Mahnaz_sharafy@yahoo.com),

# Table of contents

|                                                                                                                                            |         |
|--------------------------------------------------------------------------------------------------------------------------------------------|---------|
| 1. Control experiments.....                                                                                                                | page 4  |
| 2. Table S1. Optimization for the synthesis of 3b and 4b. ....                                                                             | page 4  |
| 3. FTIR spectrum of 2-Amino-5-(4-hydroxyphenyl)benzofuran-3-carbonitrile- <b>3a</b><br>.....                                               | page 5  |
| 4. Mass spectrum of 2-Amino-5-(4-hydroxyphenyl)benzofuran-3-carbonitrile- <b>3a</b><br>.....                                               | page 6  |
| 5. <sup>1</sup> H NMR spectrum of 2-Amino-5-(4-hydroxyphenyl)benzofuran-3-carbonitrile- <b>3a</b><br>.....                                 | page 7  |
| 6. Expanded <sup>1</sup> H NMR spectrum of 2-Amino-5-(4-hydroxyphenyl)benzofuran-3-<br>carbonitrile- <b>3a</b> .....                       | page 8  |
| 7. <sup>1</sup> H NMR spectrum of 2-Amino-5-(4-hydroxyphenyl)benzofuran-3-carbonitrile- <b>3a</b><br>(with D <sub>2</sub> O) .....         | page 9  |
| 8. <sup>13</sup> C NMR spectrum of 2-Amino-5-(4-hydroxyphenyl)benzofuran-3-carbonitrile- <b>3a</b><br>.....                                | page 10 |
| 9. FTIR spectrum of Methyl 2-amino-5-(4-hydroxyphenyl)benzofuran-3-carboxylate- <b>3b</b><br>.....                                         | page 11 |
| 10. Mass spectrum of Methyl 2-amino-5-(4-hydroxyphenyl)benzofuran-3-carboxylate- <b>3b</b><br>.....                                        | page 12 |
| 11. <sup>1</sup> H NMR spectrum of Methyl 2-amino-5-(4-hydroxyphenyl)benzofuran-3-<br>carboxylate- <b>3b</b> .....                         | page 13 |
| 12. Expanded <sup>1</sup> H NMR spectrum of Methyl 2-amino-5-(4-hydroxyphenyl)benzofuran-3-<br>carboxylate- <b>3b</b> .....                | page 14 |
| 13. <sup>1</sup> H NMR spectrum of Methyl 2-amino-5-(4-hydroxyphenyl)benzofuran-3-<br>carboxylate- <b>3b</b> (with D <sub>2</sub> O) ..... | page 15 |
| 14. <sup>13</sup> C NMR spectrum of Methyl 2-amino-5-(4-hydroxyphenyl)benzofuran-3-<br>carboxylate- <b>3b</b> .....                        | page 16 |
| 15. FTIR spectrum of Ethyl 2-amino-5-(4-hydroxyphenyl) benzofuran-3-carboxylate- <b>3c</b><br>.....                                        | page 17 |
| 16. Mass spectrum of Ethyl 2-amino-5-(4-hydroxyphenyl) benzofuran-3-carboxylate- <b>3c</b><br>.....                                        | page 18 |
| 17. <sup>1</sup> H NMR spectrum of Ethyl 2-amino-5-(4-hydroxyphenyl) benzofuran-3-carboxylate-<br><b>3c</b> .....                          | page 19 |

|                                                                                                                                                                        |         |
|------------------------------------------------------------------------------------------------------------------------------------------------------------------------|---------|
| 18. Expanded <sup>1</sup> H NMR spectrum of Ethyl 2-amino-5-(4-hydroxyphenyl) benzofuran-3-carboxylate- <b>3c</b> .....                                                | page 20 |
| 19. <sup>1</sup> H NMR spectrum of Ethyl 2-amino-5-(4-hydroxyphenyl) benzofuran-3-carboxylate- <b>3c</b> (with D <sub>2</sub> O) .....                                 | page 21 |
| 20. <sup>13</sup> C NMR spectrum of Ethyl 2-amino-5-(4-hydroxyphenyl) benzofuran-3-carboxylate- <b>3c</b> .....                                                        | page 22 |
| 21. FTIR spectrum of Methyl-2-amino-5-(3-(1-cyano-2-methoxy-2-oxoethyl)-4-hydroxyphenyl)benzofuran-3carboxylate- <b>4b</b> .....                                       | page 23 |
| 22. Mass spectrum of Methyl-2-amino-5-(3-(1-cyano-2-methoxy-2-oxoethyl)-4-hydroxyphenyl)benzofuran-3carboxylate- <b>4b</b> .....                                       | page 24 |
| 23. <sup>1</sup> H NMR spectrum of Methyl-2-amino-5-(3-(1-cyano-2-methoxy-2-oxoethyl)-4-hydroxyphenyl)benzofuran-3carboxylate- <b>4</b> .....                          | page 25 |
| 24. Expanded <sup>1</sup> H NMR spectrum of Methyl-2-amino-5-(3-(1-cyano-2-methoxy-2-oxoethyl)-4-hydroxyphenyl)benzofuran-3carboxylate- <b>4</b> .....                 | page 26 |
| 25. <sup>1</sup> H NMR spectrum of Methyl-2-amino-5-(3-(1-cyano-2-methoxy-2-oxoethyl)-4-hydroxyphenyl)benzofuran-3carboxylate- <b>4b</b> (with D <sub>2</sub> O) ..... | page 27 |
| 26. <sup>13</sup> C NMR spectrum of Methyl-2-amino-5-(3-(1-cyano-2-methoxy-2-oxoethyl)-4-hydroxyphenyl)benzofuran-3carboxylate- <b>4b</b> .....                        | page 28 |
| 27. Expanded <sup>13</sup> C NMR spectrum of Methyl-2-amino-5-(3-(1-cyano-2-methoxy-2-oxoethyl)-4-hydroxyphenyl)benzofuran-3carboxylate- <b>4b</b> .....               | page 29 |
| 28. FTIR spectrum of Ethyl 2-amino-5-(3-(1-cyano-3-ethoxy-2-oxopropyl)-4-hydroxyphenyl)benzofuran-3-carboxylate- <b>4c</b> .....                                       | page 30 |
| 29. Mass spectrum of Ethyl 2-amino-5-(3-(1-cyano-3-ethoxy-2-oxopropyl)-4-hydroxyphenyl)benzofuran-3-carboxylate - <b>4c</b> .....                                      | page 31 |
| 30. <sup>1</sup> H NMR spectrum of Ethyl 2-amino-5-(3-(1-cyano-3-ethoxy-2-oxopropyl)-4-hydroxyphenyl)benzofuran-3-carboxylate - <b>4c</b> .....                        | page 32 |
| 31. Expanded <sup>1</sup> H NMR spectrum of Ethyl 2-amino-5-(3-(1-cyano-3-ethoxy-2-oxopropyl)-4-hydroxyphenyl)benzofuran-3-carboxylate - <b>4c</b> .....               | page 33 |
| 32. <sup>1</sup> H NMR spectrum of Ethyl 2-amino-5-(3-(1-cyano-3-ethoxy-2-oxopropyl)-4-hydroxyphenyl)benzofuran-3-carboxylate - <b>4c</b> (with D <sub>2</sub> O)..... | page 34 |
| 33. <sup>13</sup> C NMR spectrum of Ethyl 2-amino-5-(3-(1-cyano-3-ethoxy-2-oxopropyl)-4-hydroxyphenyl)benzofuran-3-carboxylate - <b>4c</b> .....                       | page 35 |
| 34. Fig. S1. The cell designed for electrochemical synthesis.....                                                                                                      | page 36 |

**Control experiments:** We initiated our studies by using **4BP** and **1b** in aqueous media, as model substrates to identify the optimized reaction conditions. As shown in Table below, when constant current electrolysis (CCE) of **4BP** and **1b** was performed in carbonate buffer (0.2M, pH= 9.0)/ ethanol (50:50) and at the current density 0.6 mA cm<sup>-2</sup> (**3b**) and 1.2 mA cm<sup>-2</sup> (**4b**), the desired products **3b** and **4b** were isolated on the best yield 90-95% yield (entry 4). Therefore, the following optimization experiments were carried out under this condition.

Table S1. Optimization for the synthesis of 3b and 4b.

| Entry | Solvent                                                   | Yield (%) 3b           |                        |                        |                        |
|-------|-----------------------------------------------------------|------------------------|------------------------|------------------------|------------------------|
|       |                                                           | 0.3 mA/cm <sup>2</sup> | 0.6 mA/cm <sup>2</sup> | 1.0 mA/cm <sup>2</sup> | 1.2 mA/cm <sup>2</sup> |
| 1     | Phosphate buffer solution (0.2 M, pH=5.0)                 | 20                     | 25                     | Trace                  | Trace                  |
| 2     | Phosphate buffer solution (0.2 M, pH=7.0)                 | 40                     | 60                     | 30                     | Trace                  |
| 3     | Carbonate buffer solution (0.2 M, pH=9.0)                 | 60                     | 75                     | 20                     | 20                     |
| 4     | Carbonate buffer (0.2M, pH=9.0) / Ethanol mixture (50:50) | 80                     | 95                     | 30                     | 15                     |

| Entry | Solvent                                                   | Yield (%) 4b           |                        |                        |                        |
|-------|-----------------------------------------------------------|------------------------|------------------------|------------------------|------------------------|
|       |                                                           | 0.6 mA/cm <sup>2</sup> | 1.0 mA/cm <sup>2</sup> | 1.2 mA/cm <sup>2</sup> | 1.5 mA/cm <sup>2</sup> |
| 1     | Phosphate buffer solution (0.2 M, pH=5.0)                 | Trace                  | Trace                  | 30                     | 20                     |
| 2     | Phosphate buffer solution (0.2 M, pH=7.0)                 | Trace                  | 30                     | 40                     | 30                     |
| 3     | Carbonate buffer solution (0.2 M, pH=9.0)                 | 10                     | 60                     | 70                     | 50                     |
| 4     | Carbonate buffer (0.2M, pH=9.0) / Ethanol mixture (50:50) | 20                     | 80                     | 90                     | 75                     |

FT-IR spectrum of 3a

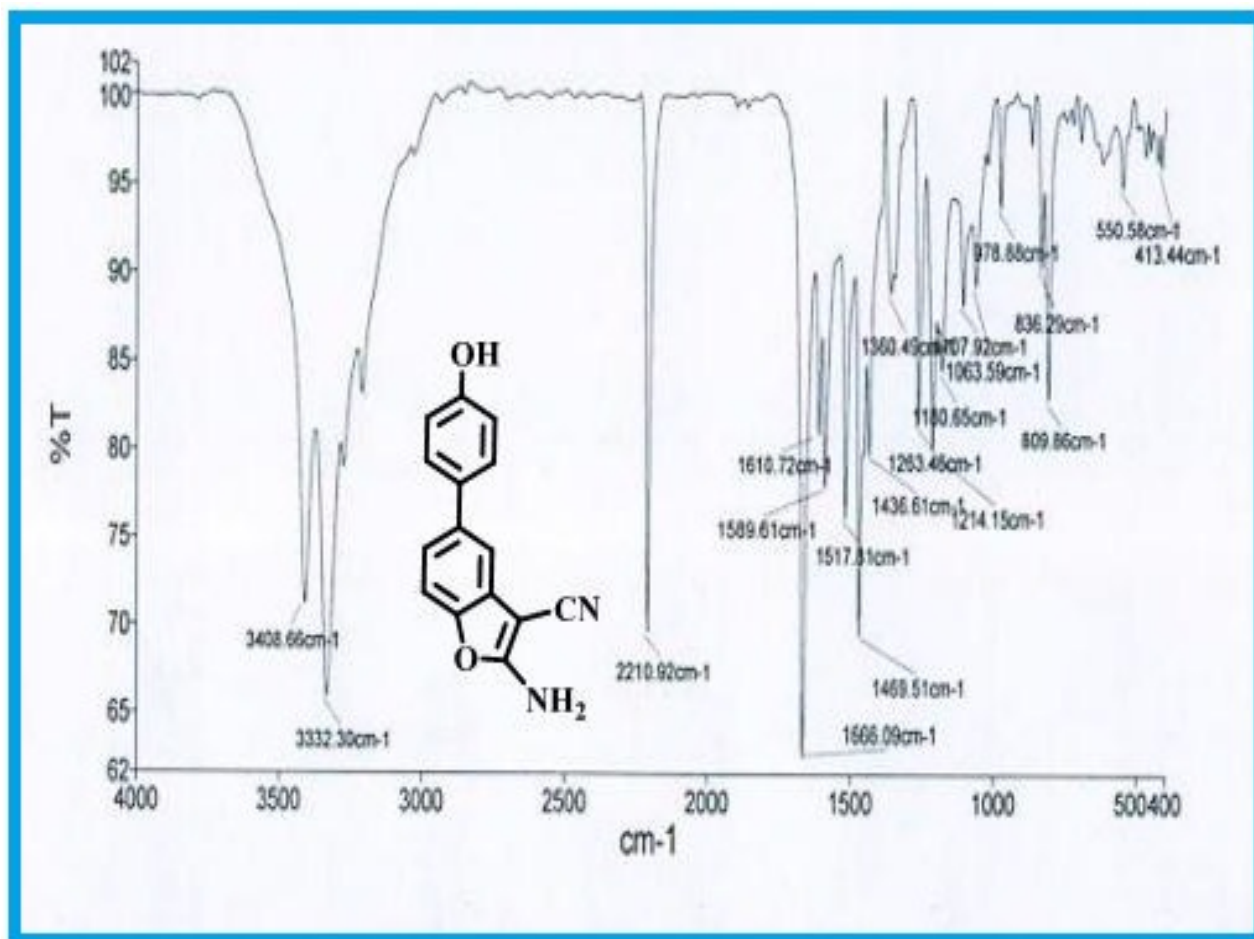

# MS spectrum of 3a

Abundance

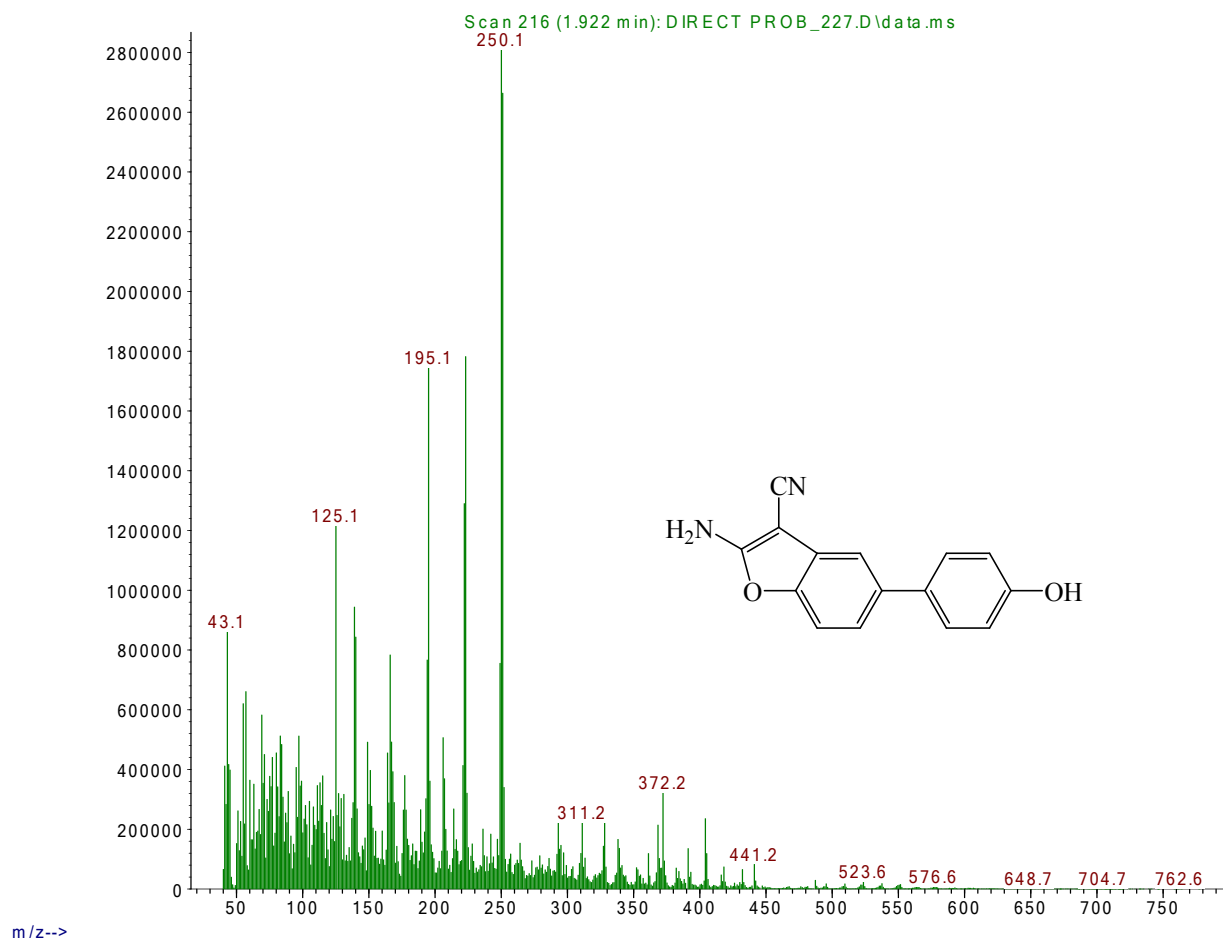

**<sup>1</sup>H NMR spectrum of 3a**

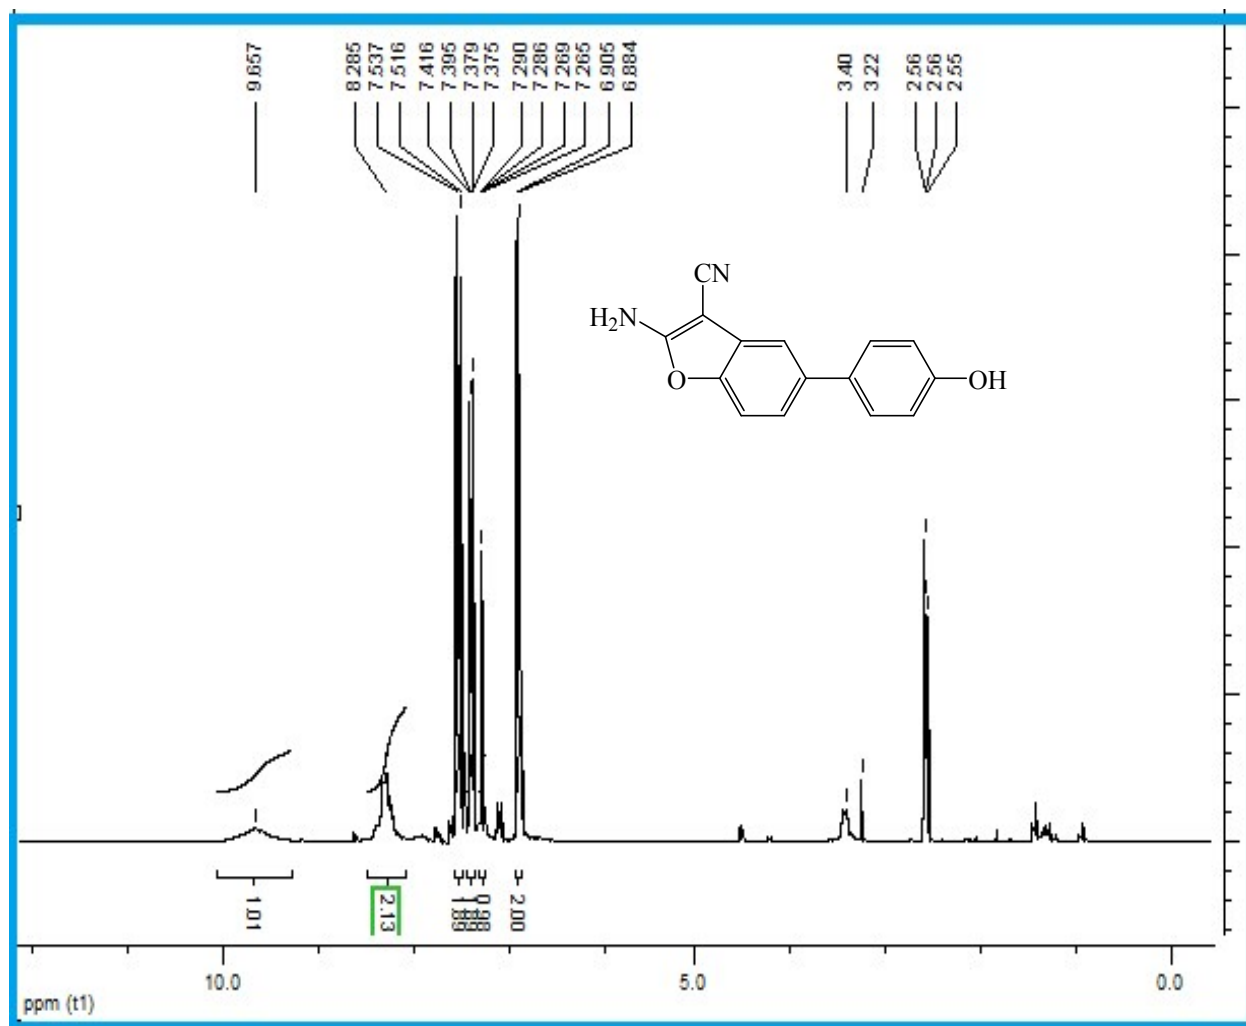

### Expanded <sup>1</sup>H NMR spectrum of 3a

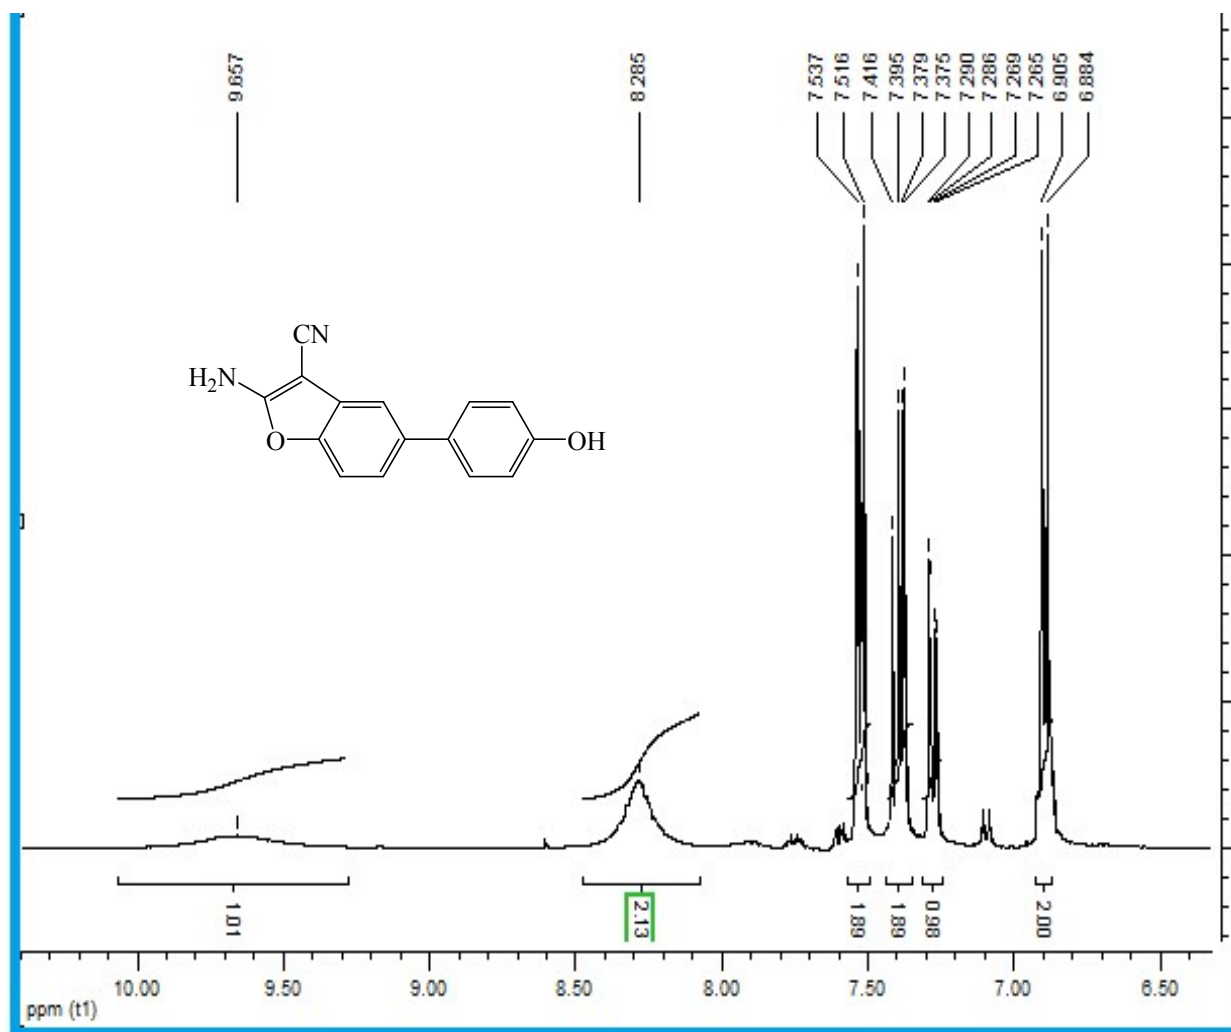



**<sup>1</sup>H NMR spectrum of 3a (with D<sub>2</sub>O)**

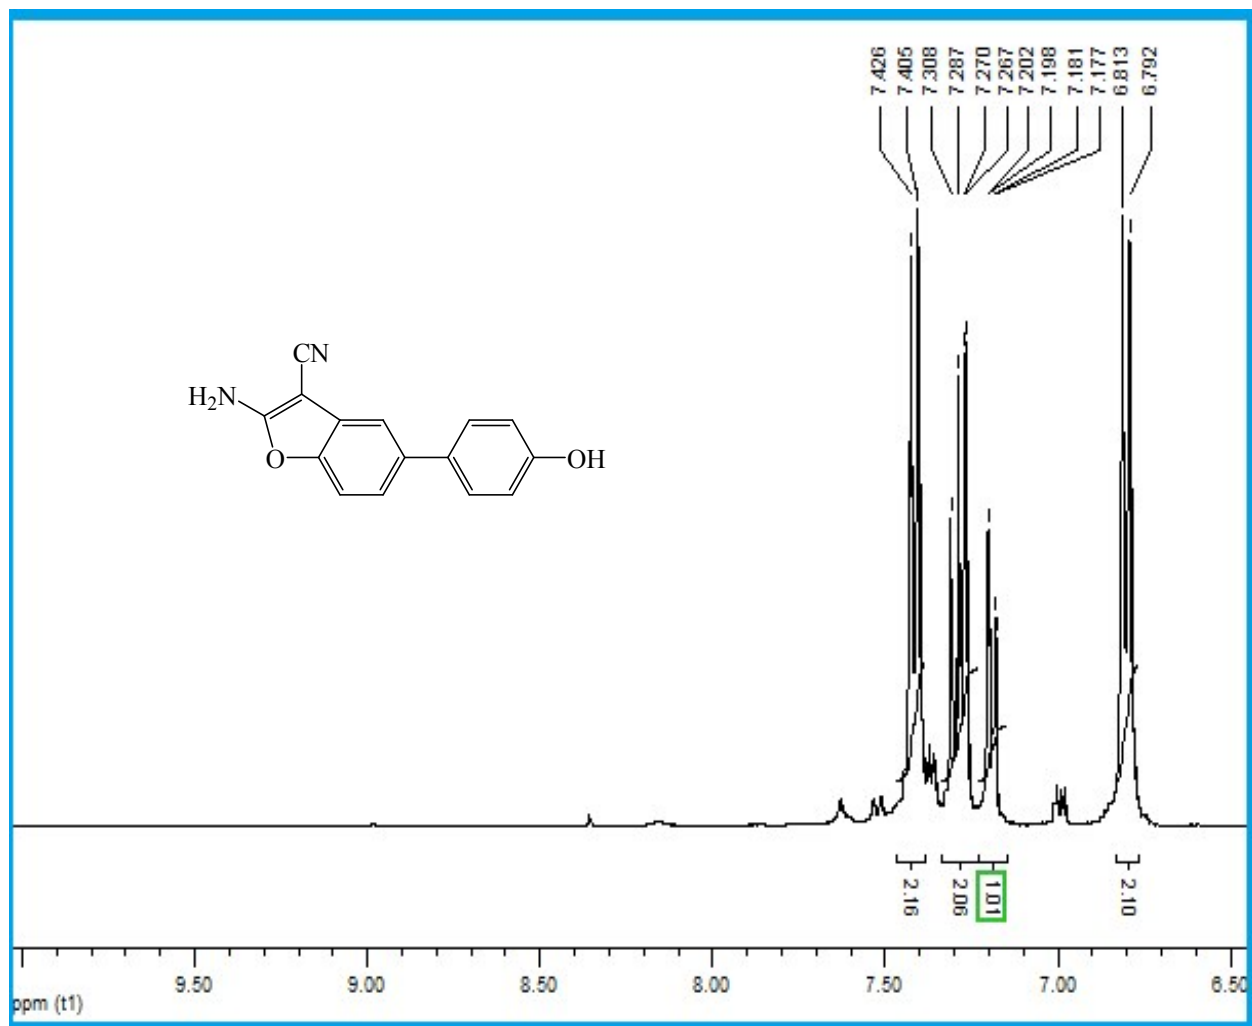

<sup>13</sup>C NMR spectrum of 3a

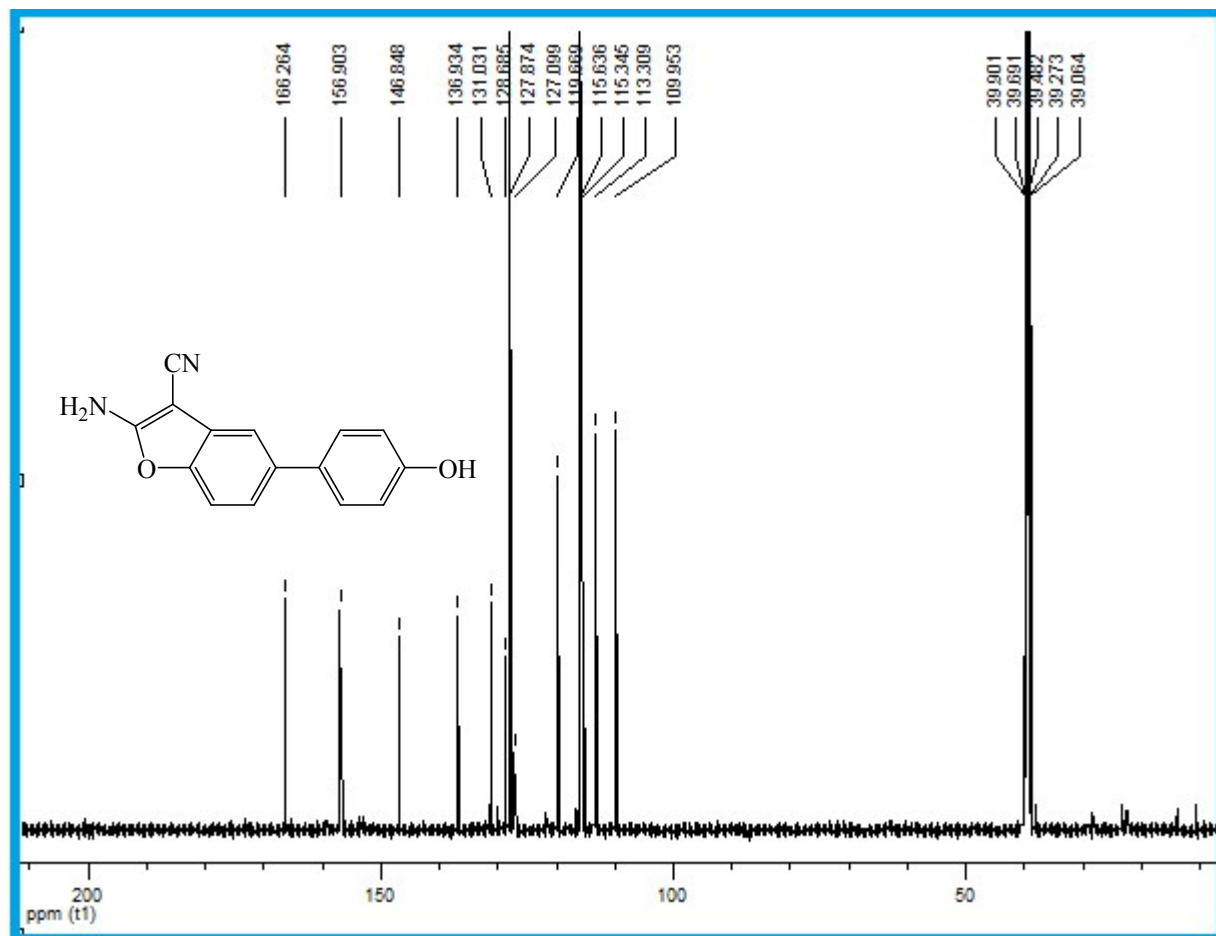

### FT-IR spectrum of 3b

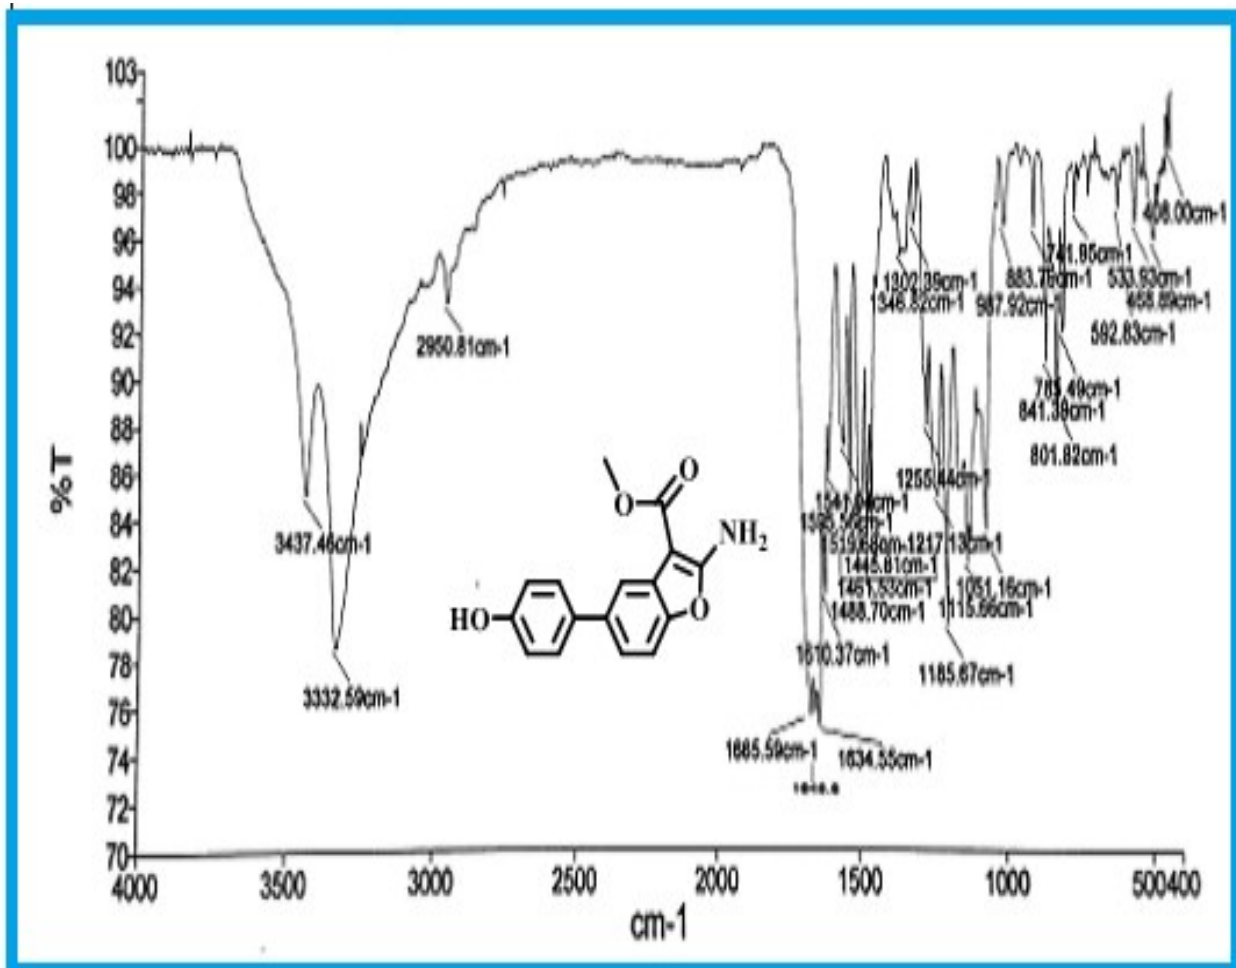

# MS spectrum of 3b

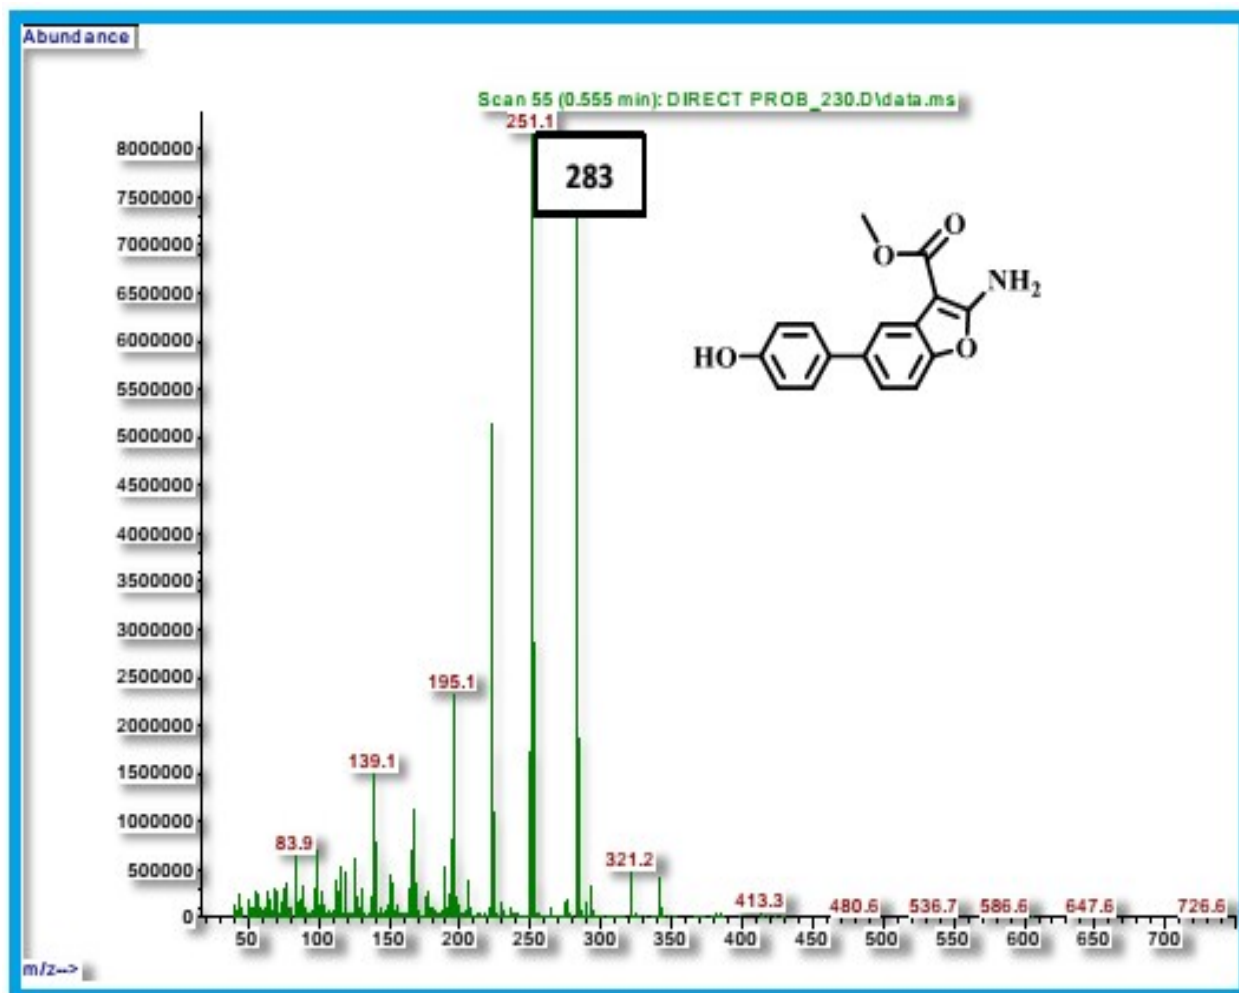

<sup>1</sup>H NMR spectrum of 3b

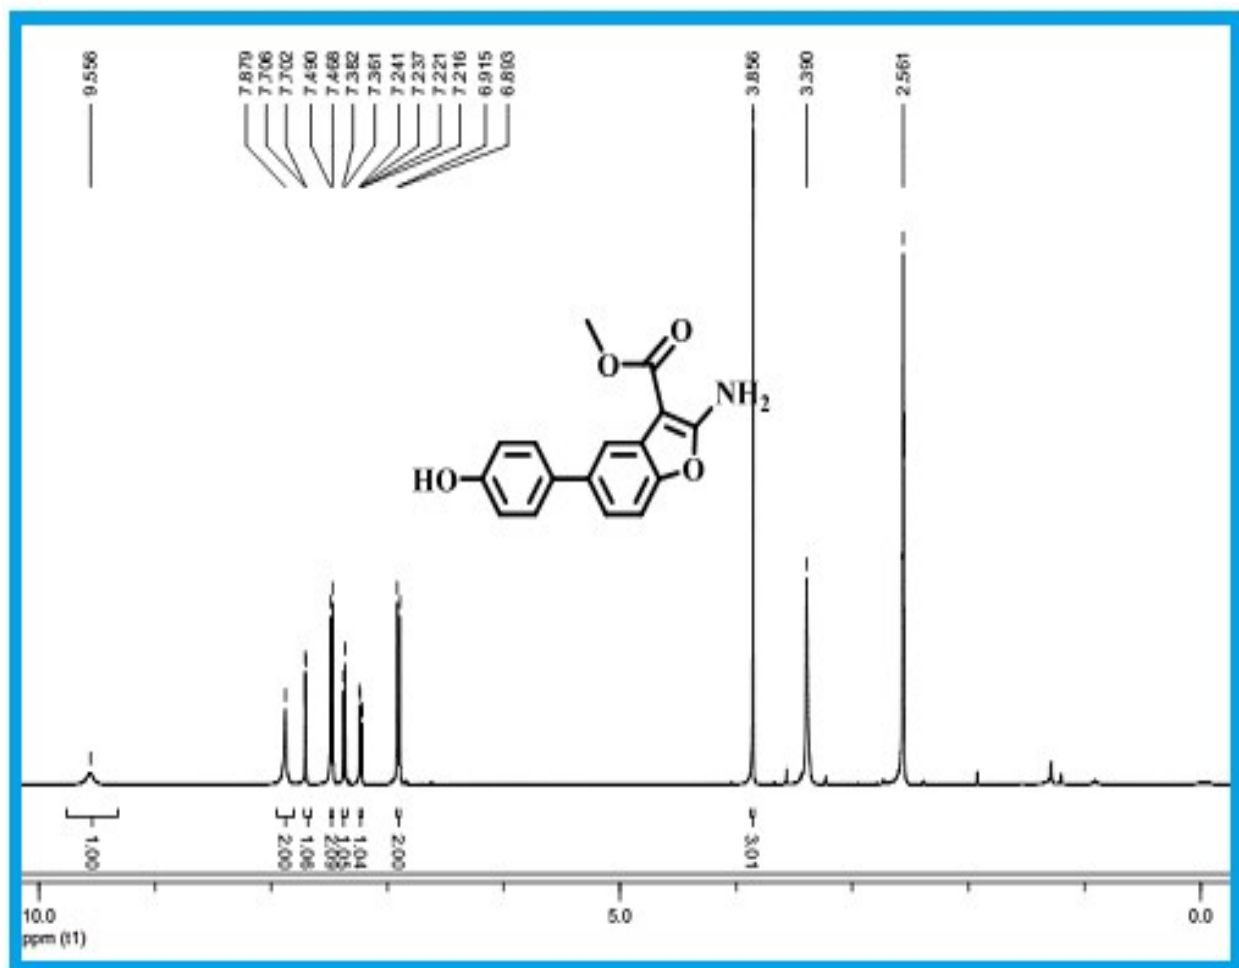

Expanded  $^1\text{H}$  NMR spectrum of 3b

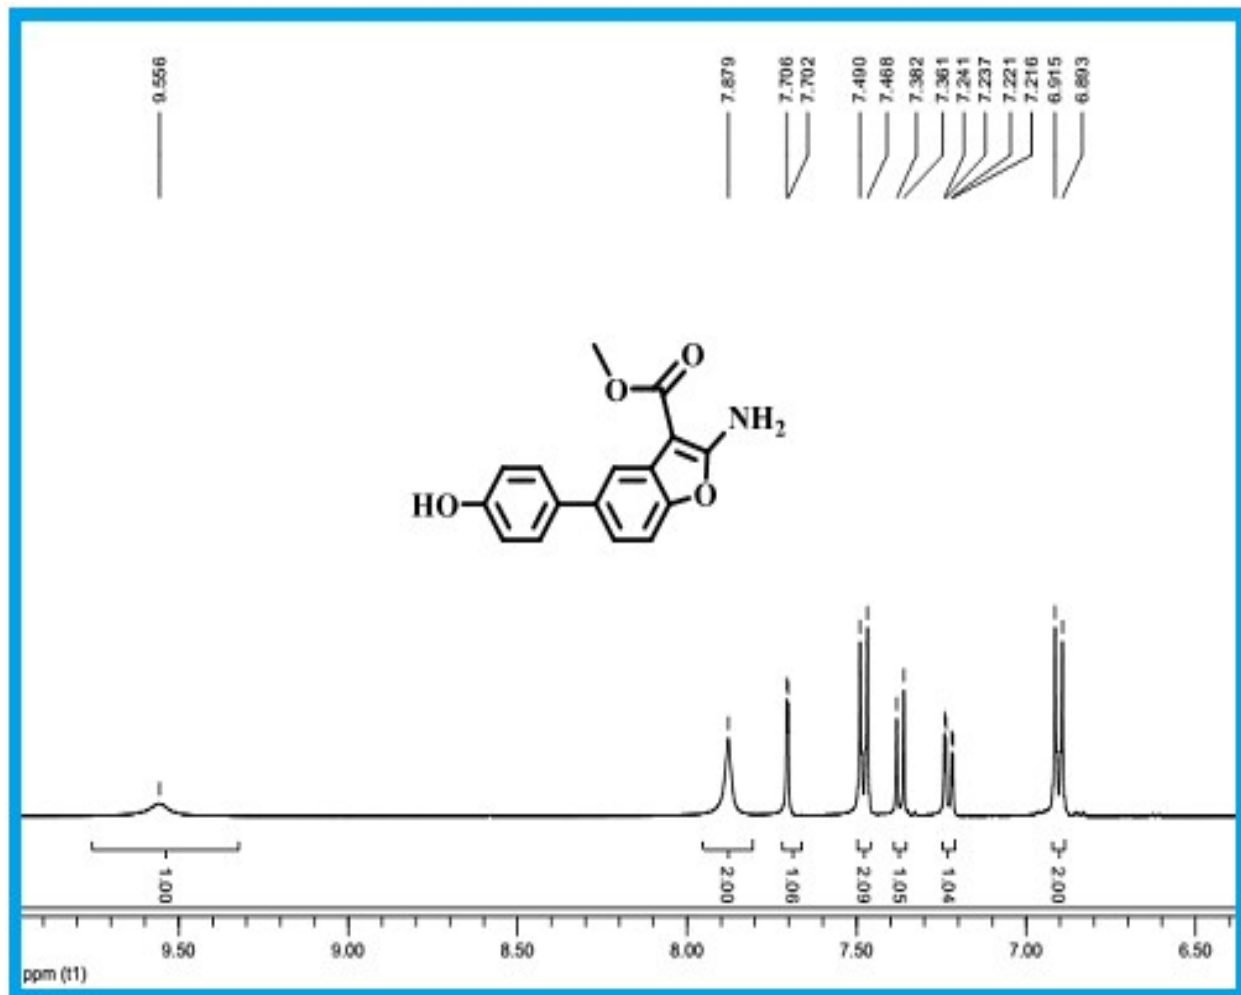

<sup>1</sup>H NMR spectrum of 3b (with D<sub>2</sub>O)

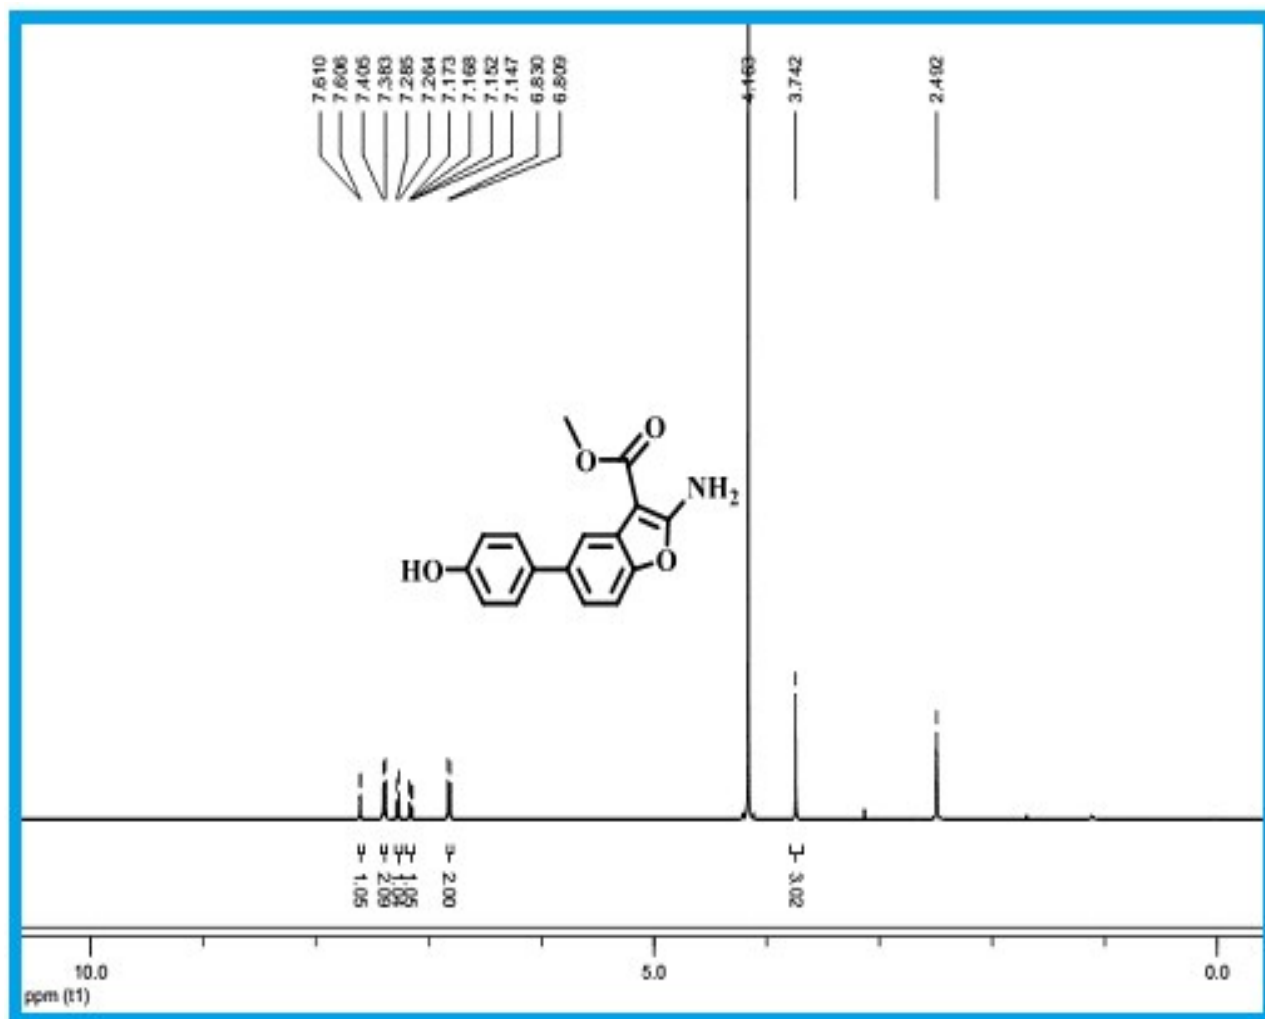

<sup>13</sup>C NMR spectrum of 3b

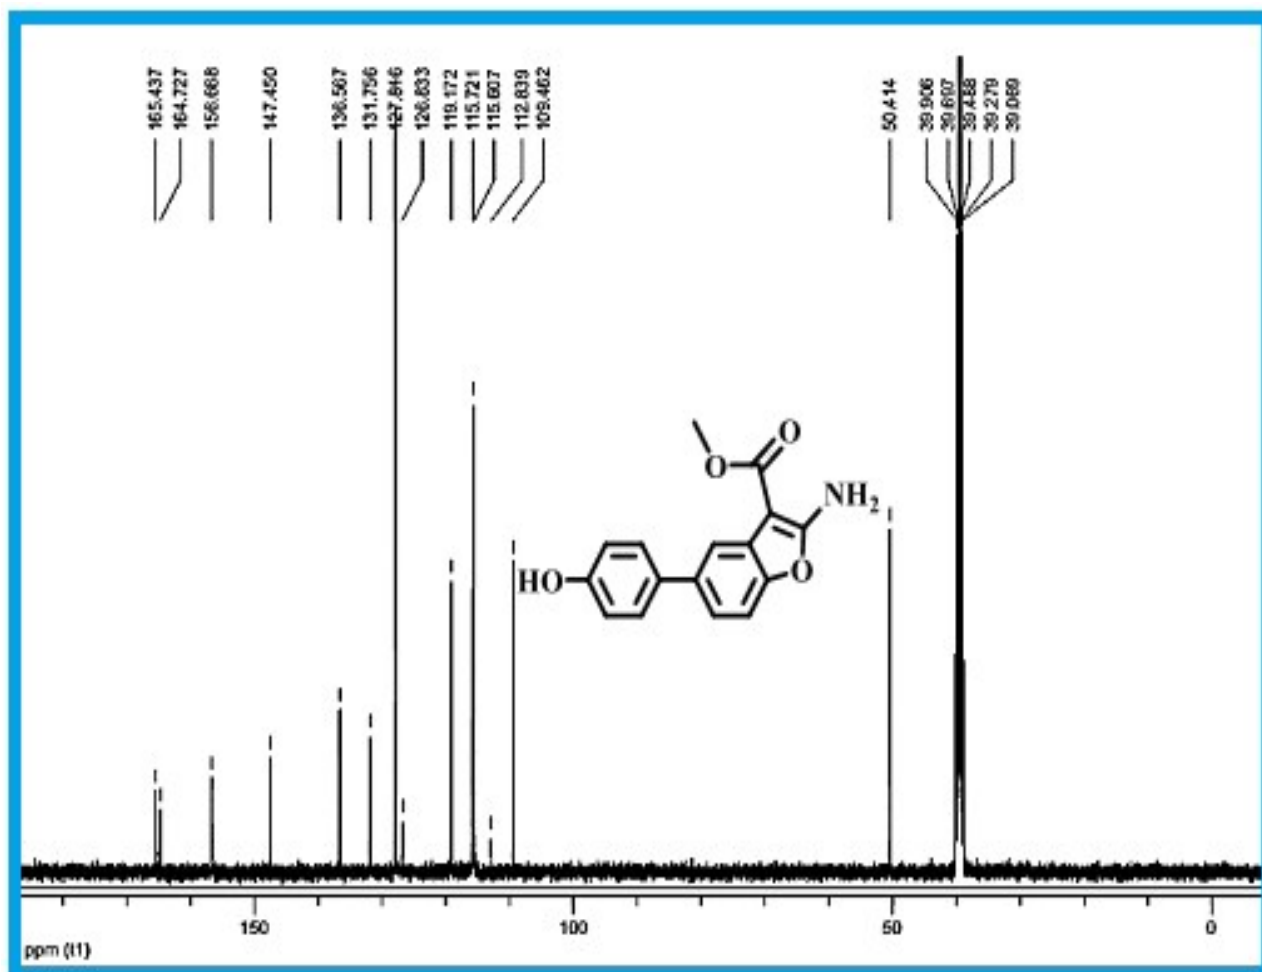



### FT-IR spectrum of 3c

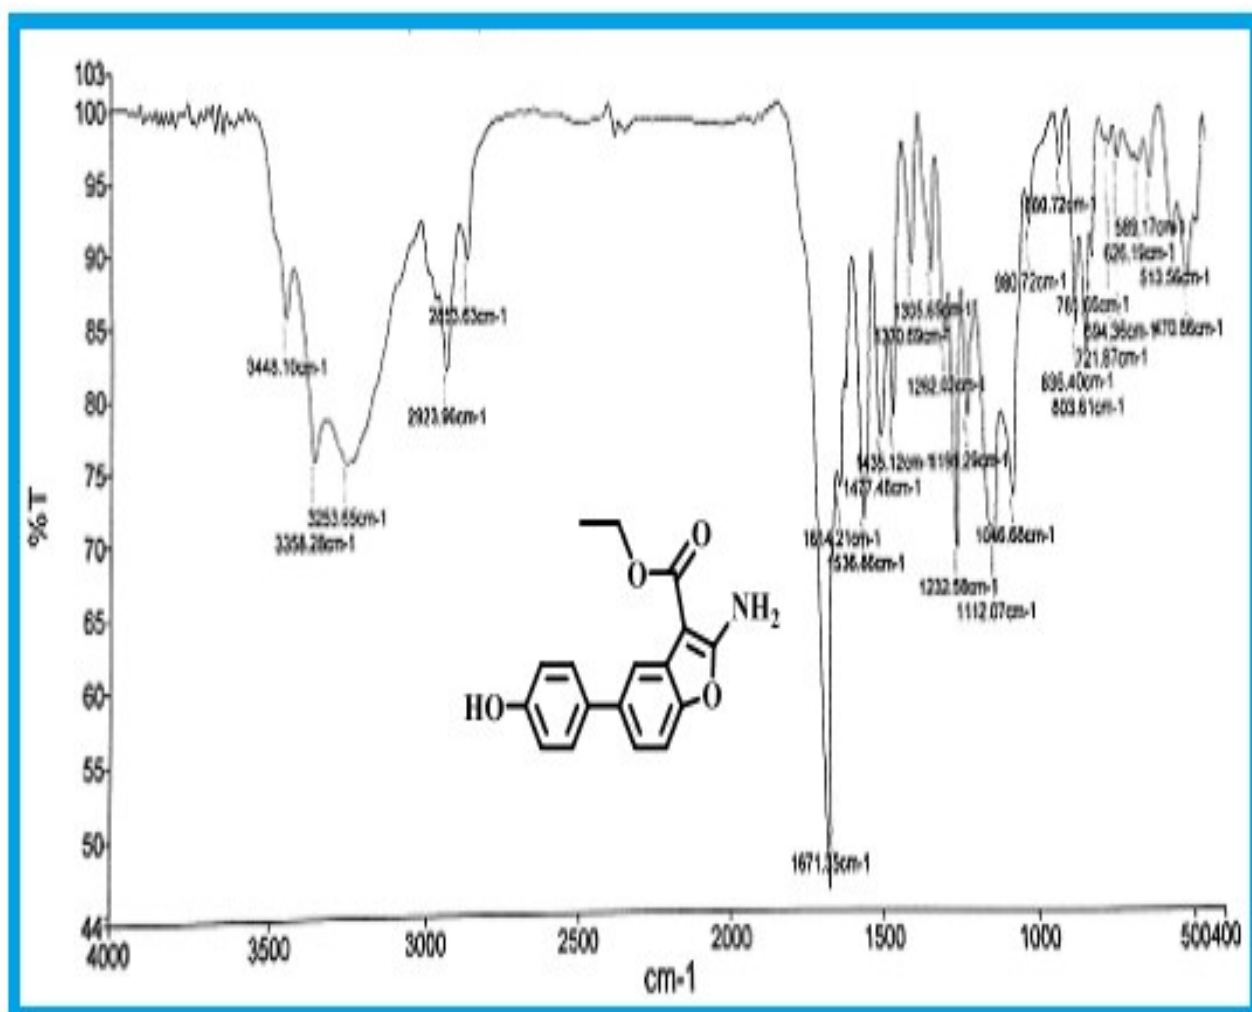

# MS spectrum of 3c

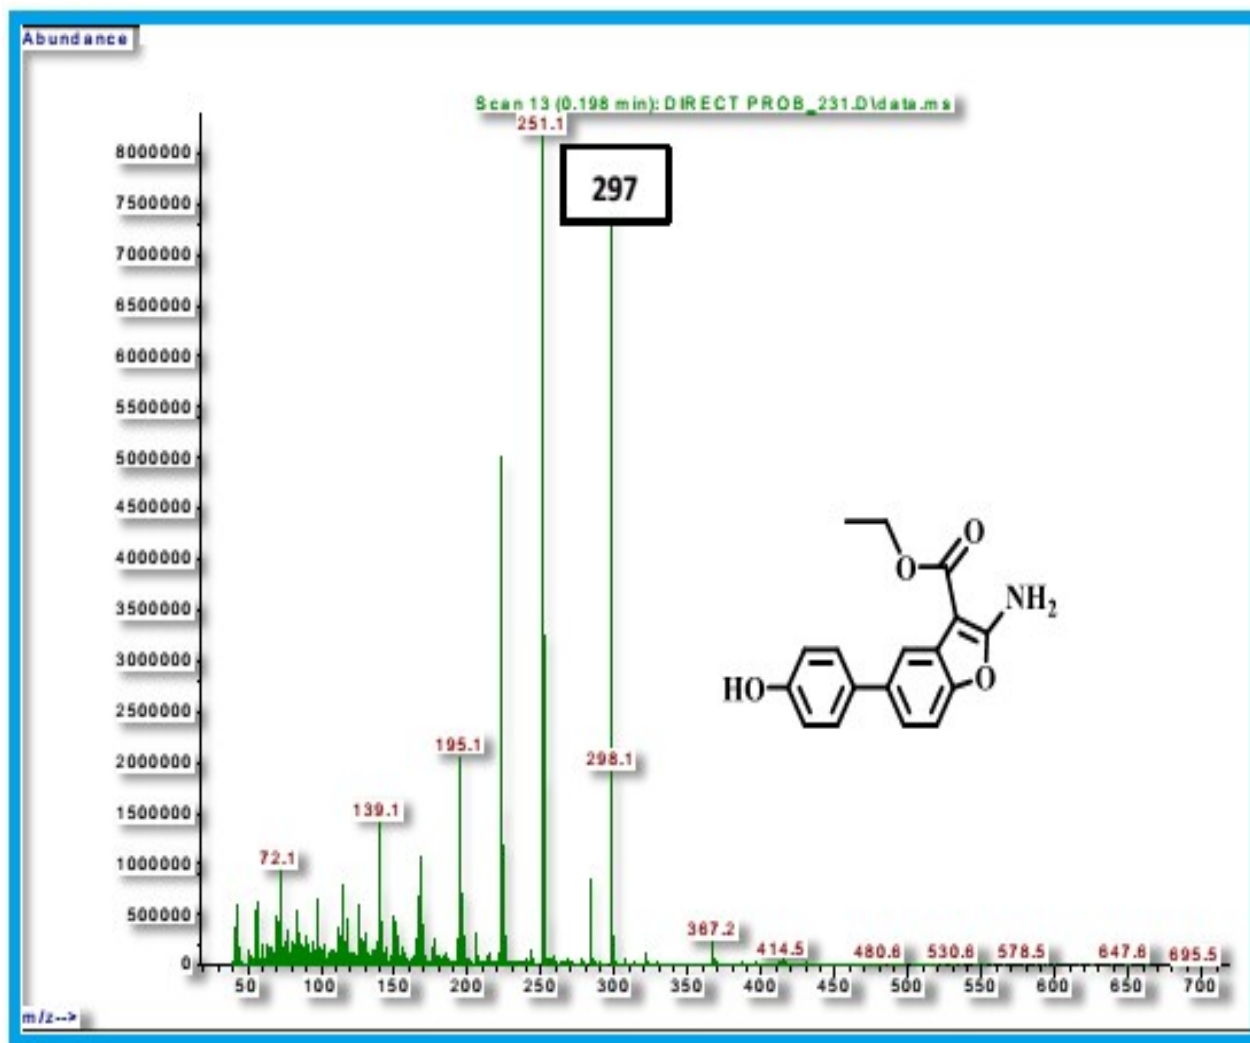

<sup>1</sup>H NMR spectrum of 3c

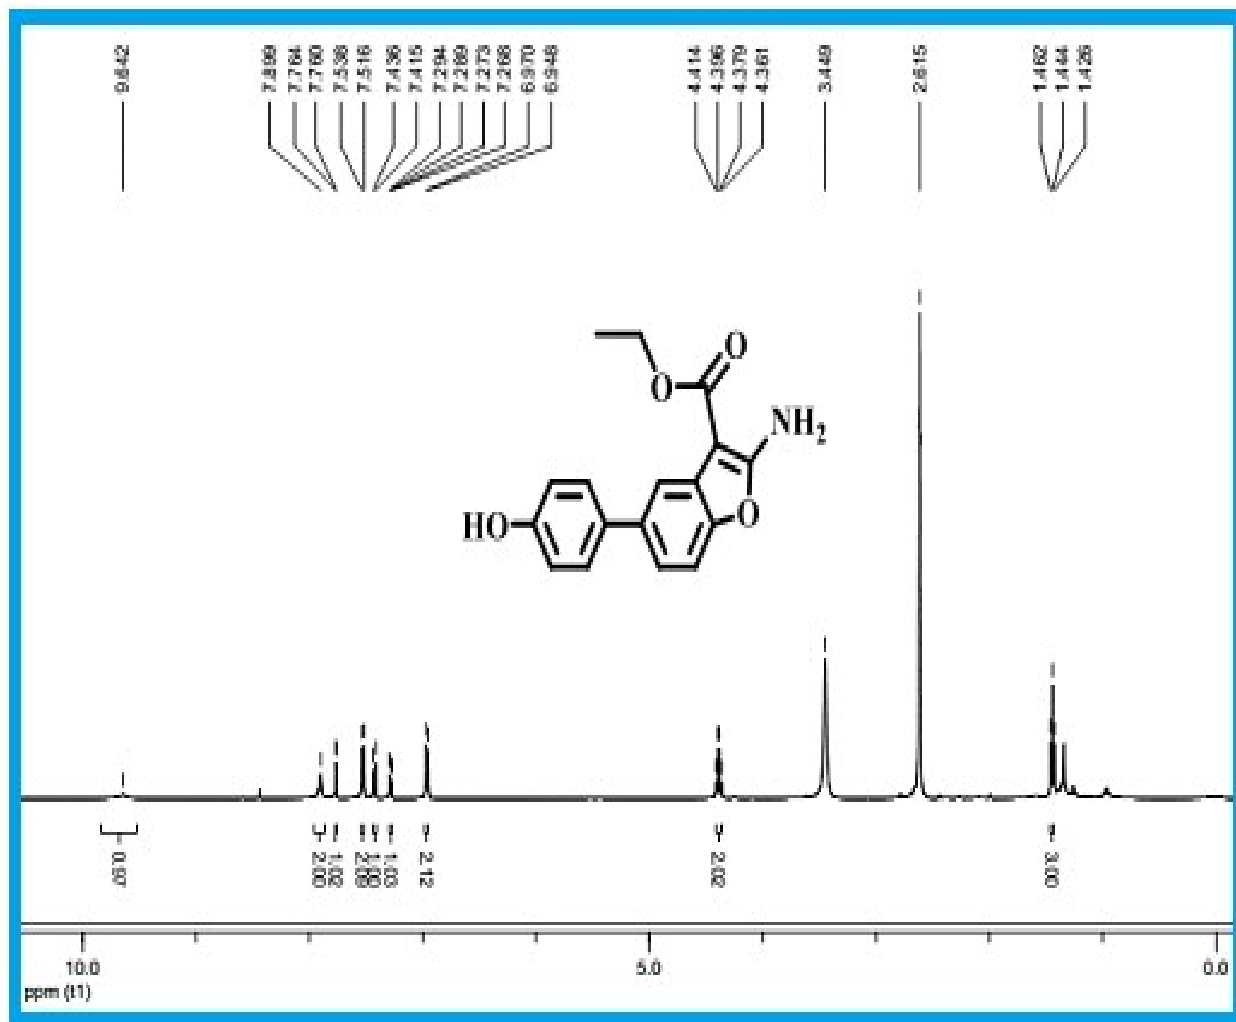

### Expanded $^1\text{H}$ NMR spectrum of 3c

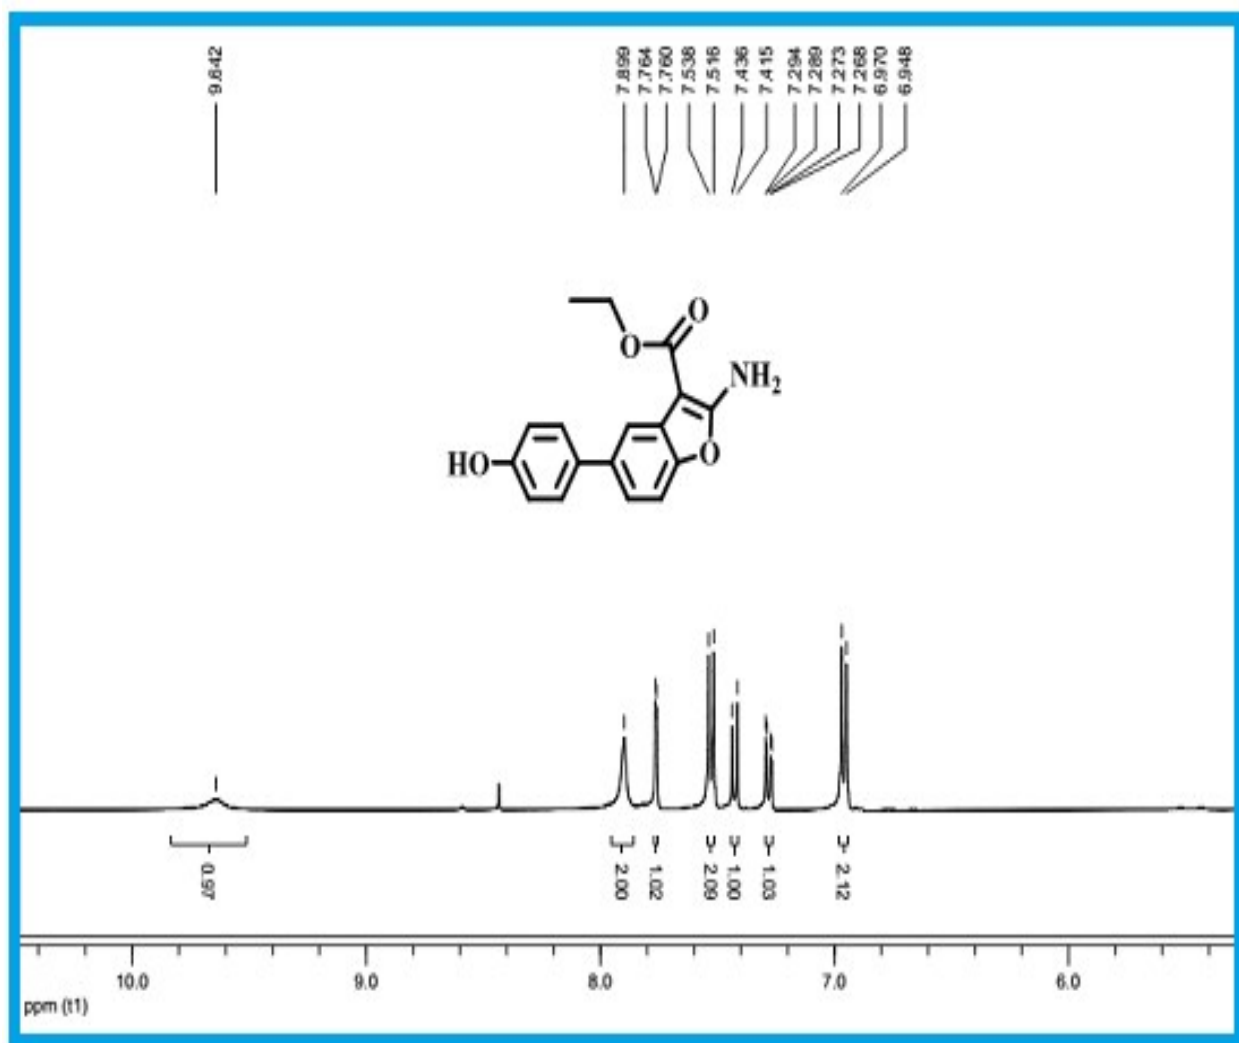

<sup>1</sup>H NMR spectrum of 3c (with D<sub>2</sub>O)

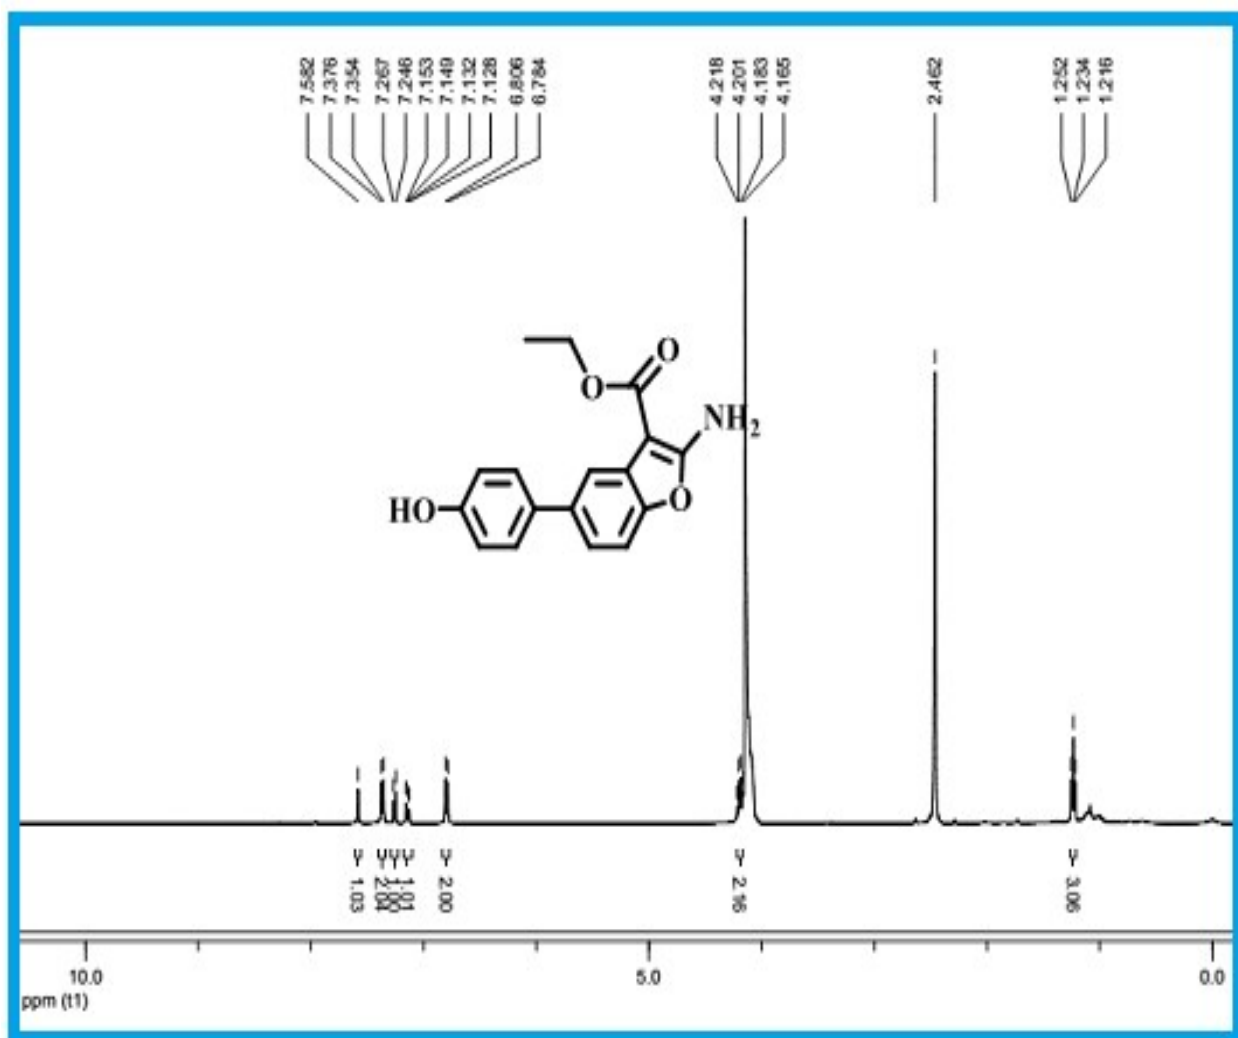

<sup>13</sup>C NMR spectrum of 3c

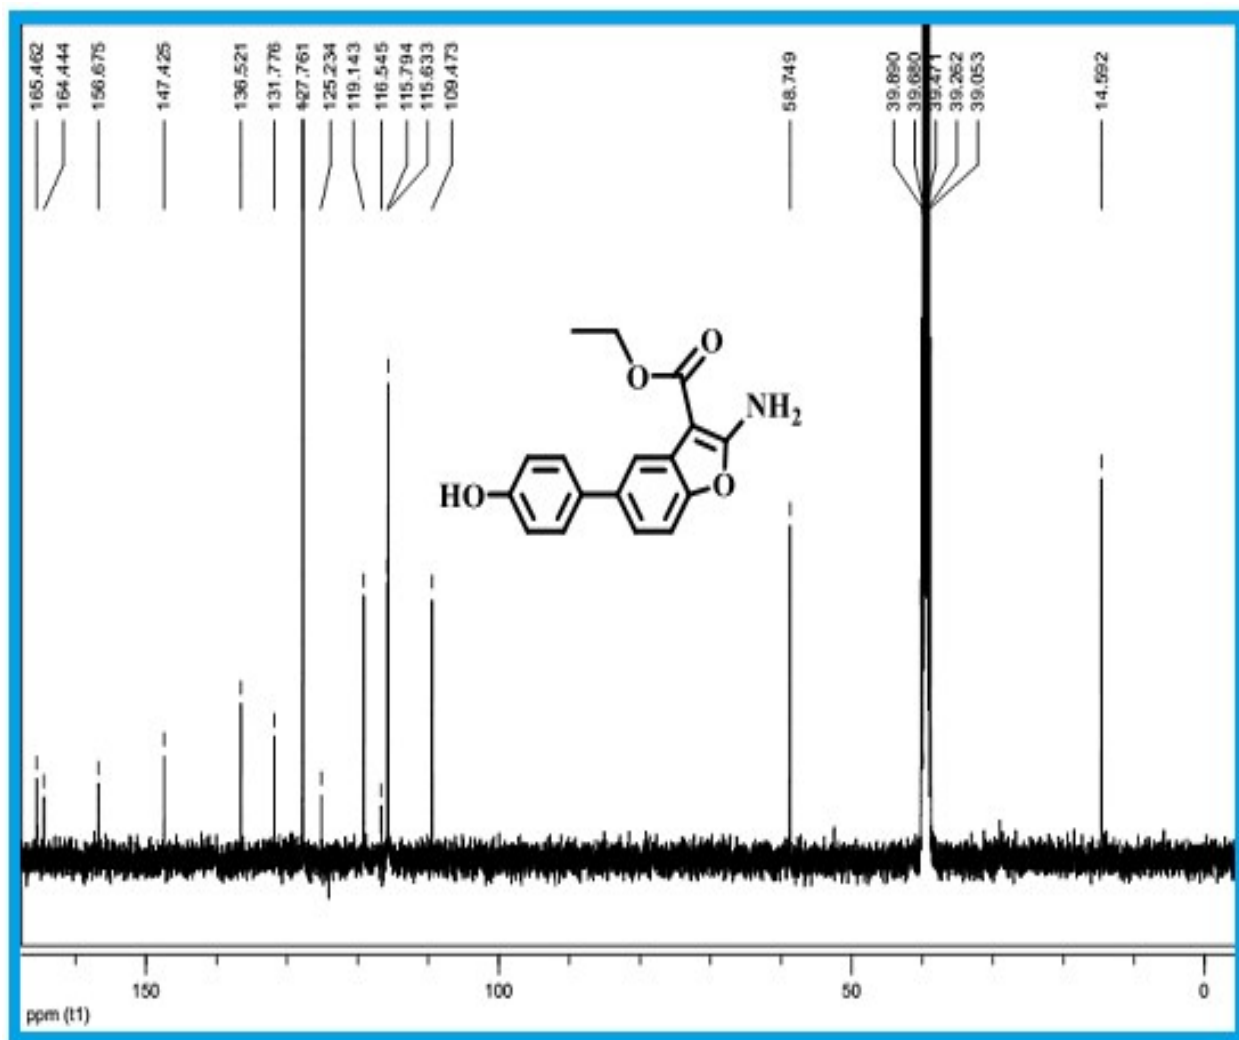

### FT-IR spectrum of 4b

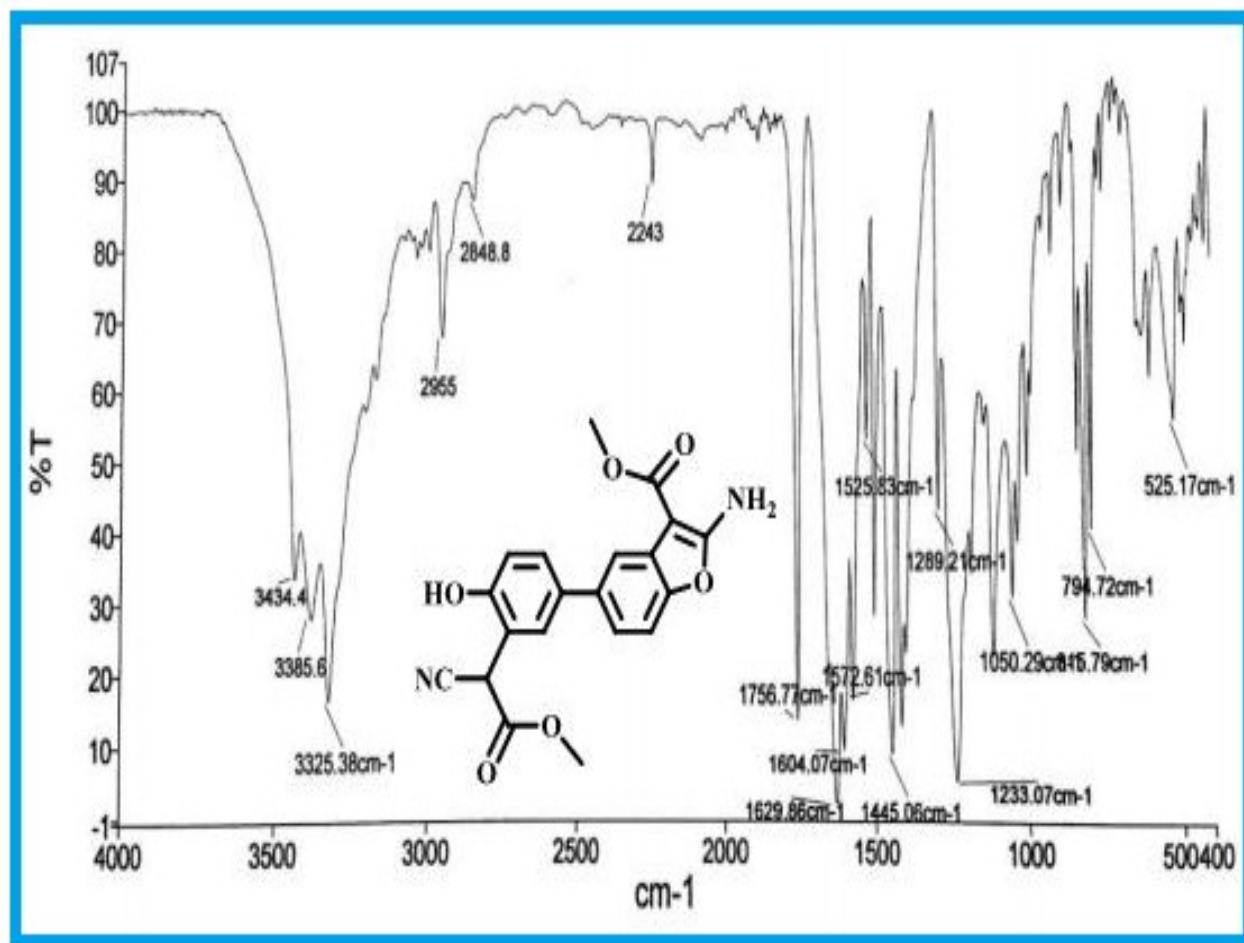

# MS spectrum of 4b

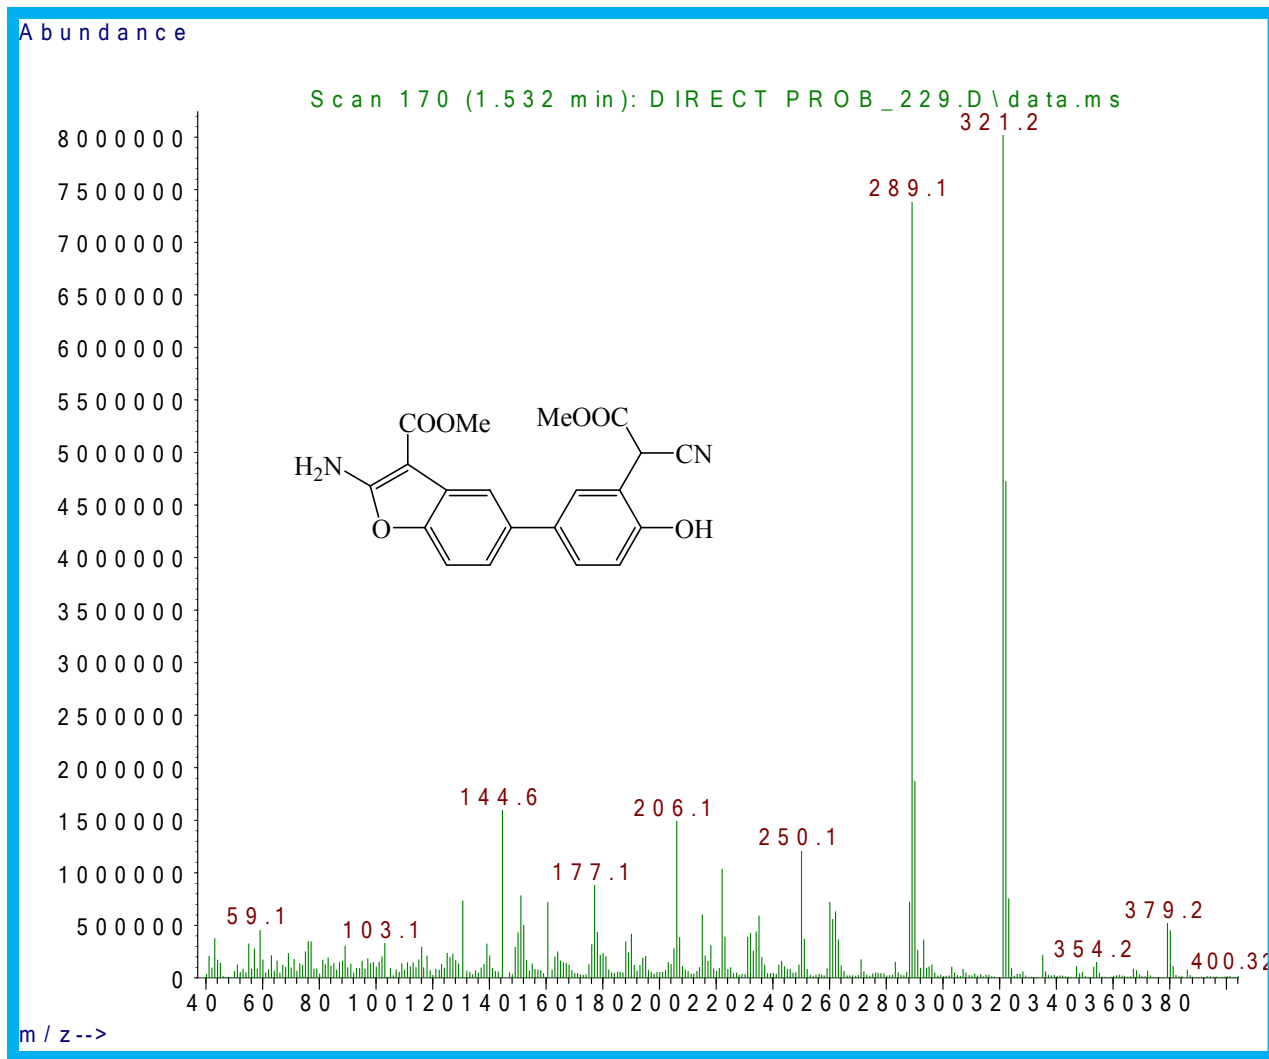



**<sup>1</sup>H NMR spectrum of 4b**

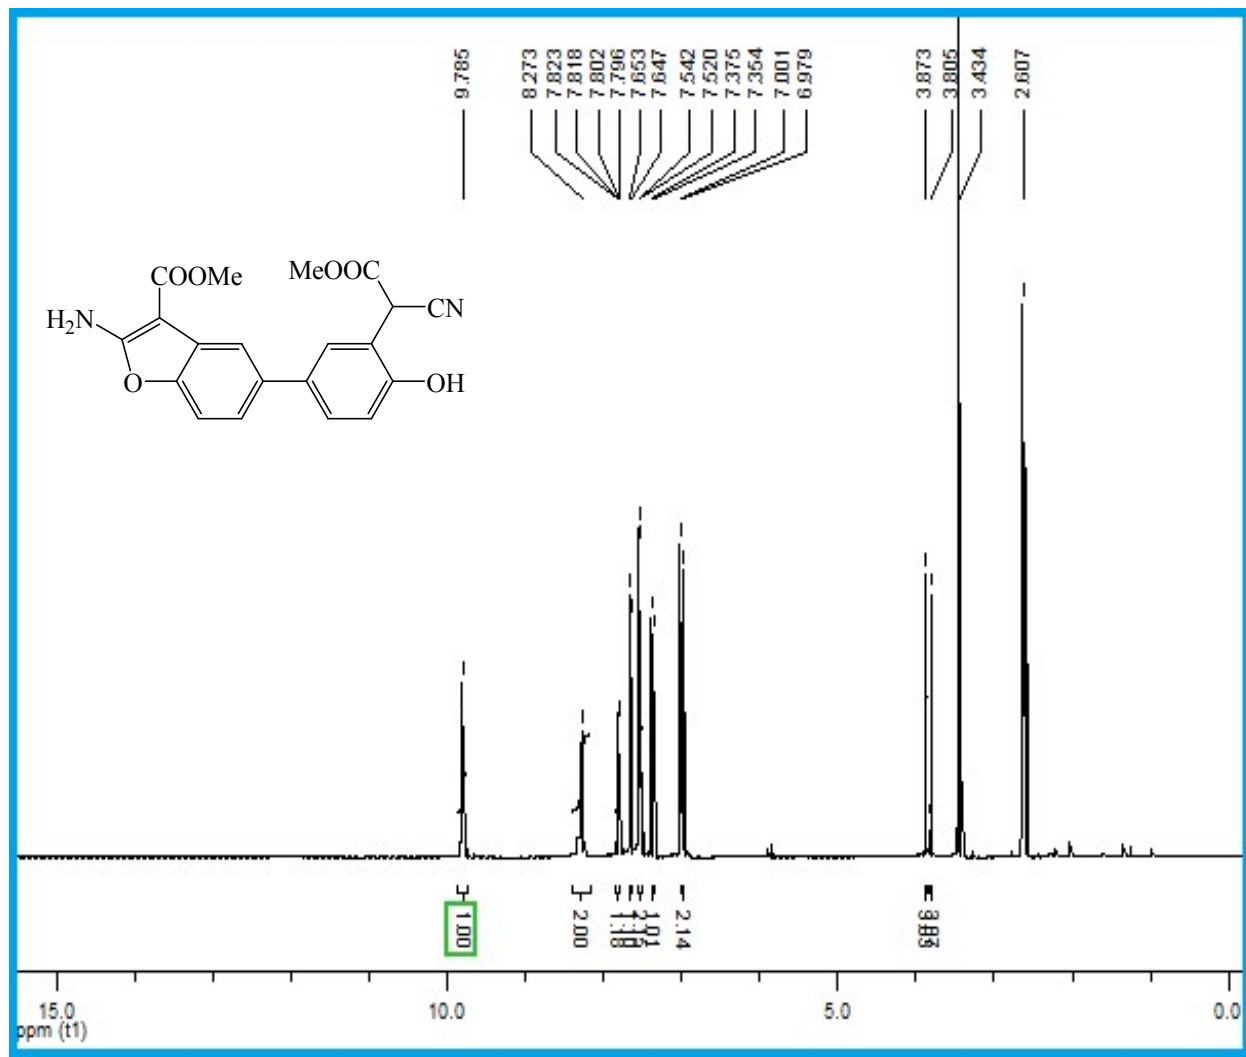

### Expanded $^1\text{H}$ NMR spectrum of 4b

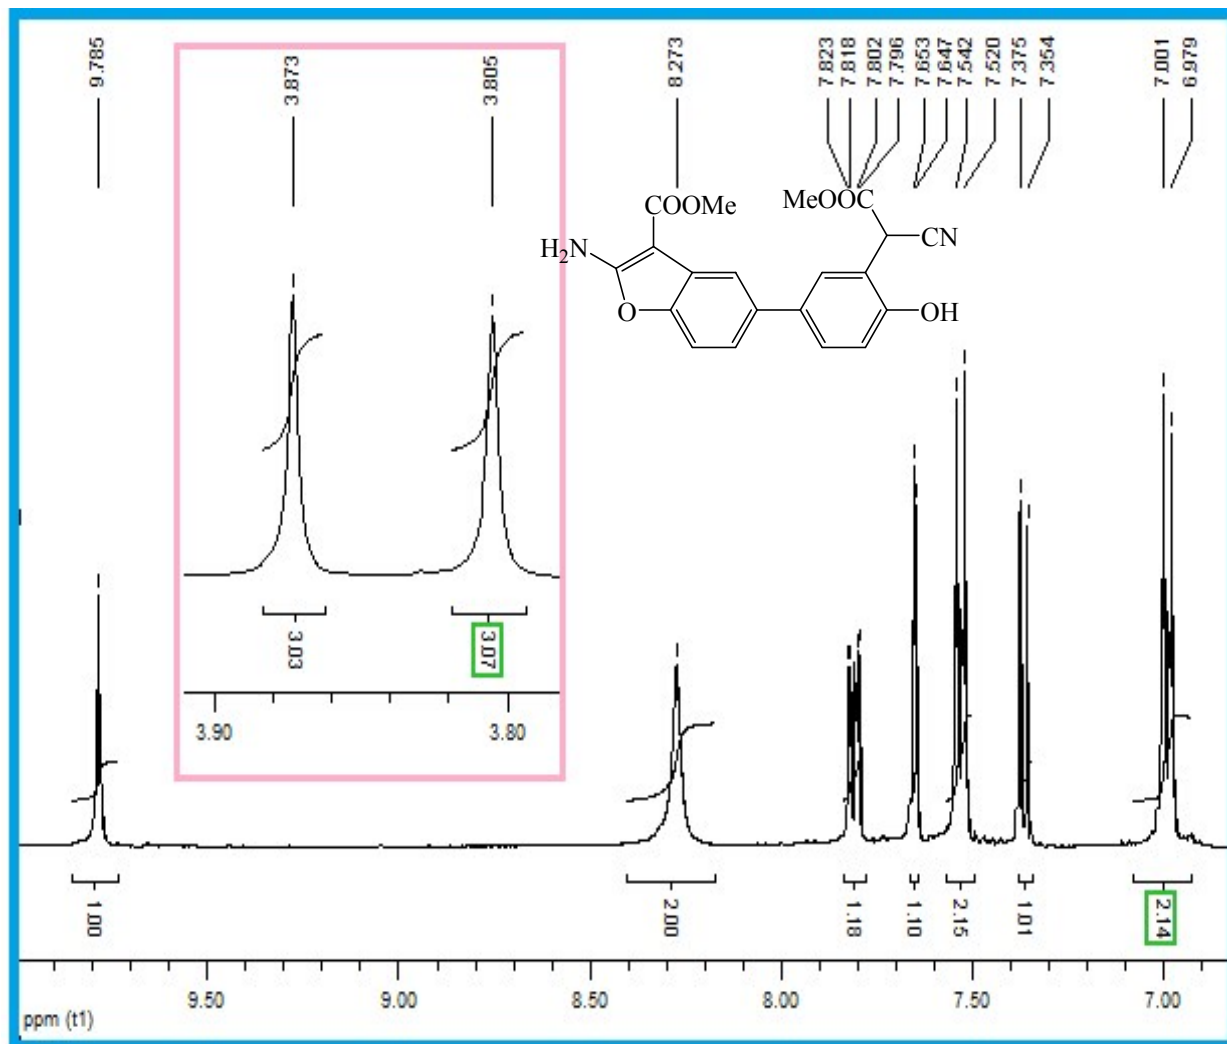

<sup>1</sup>H NMR spectrum of 4b (with D<sub>2</sub>O)

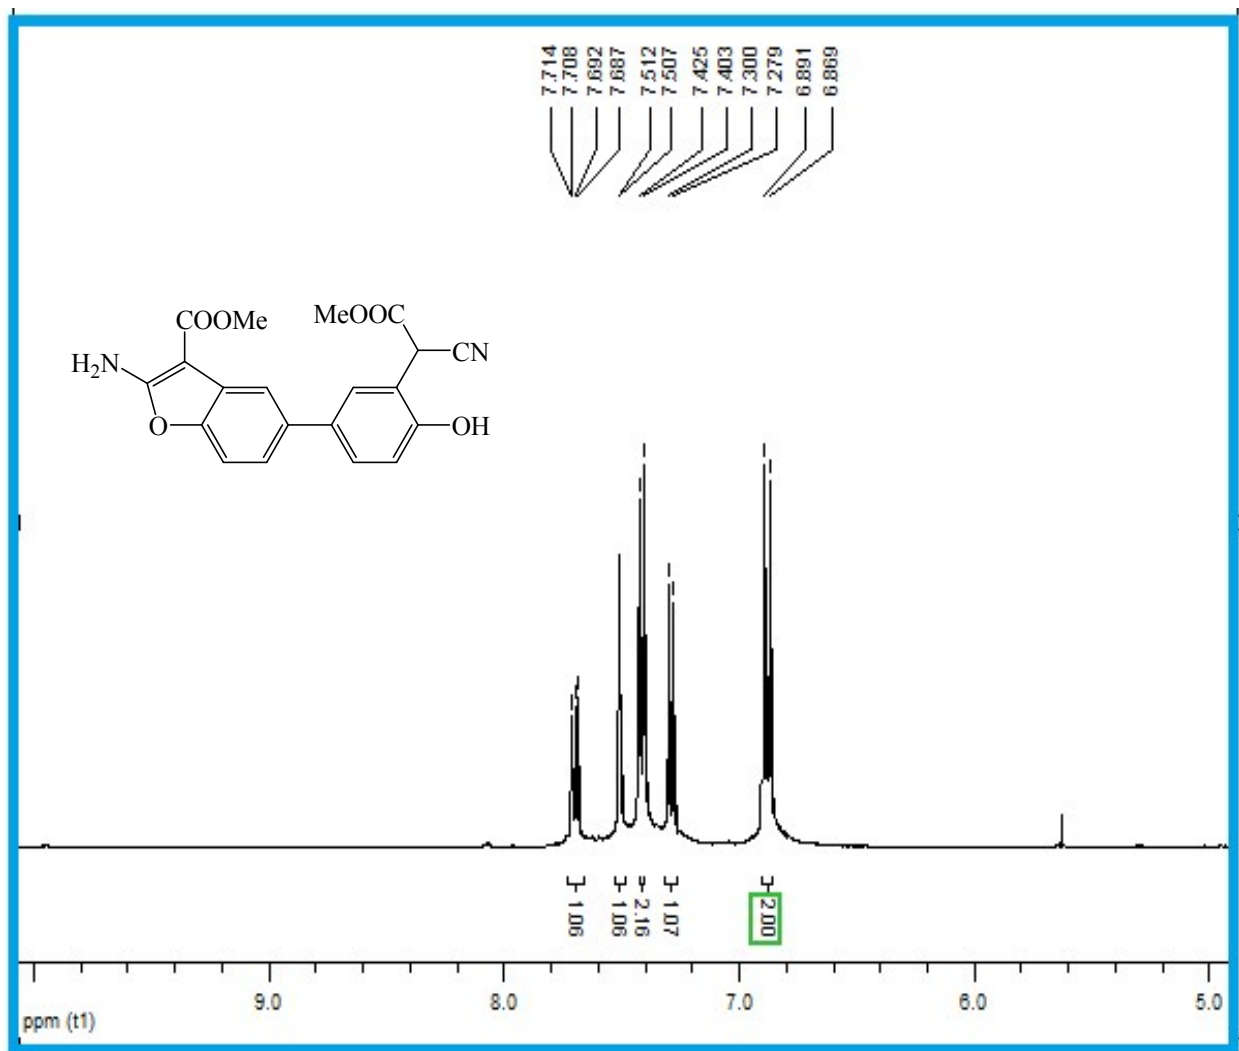

**<sup>13</sup>C NMR spectrum of 4b**

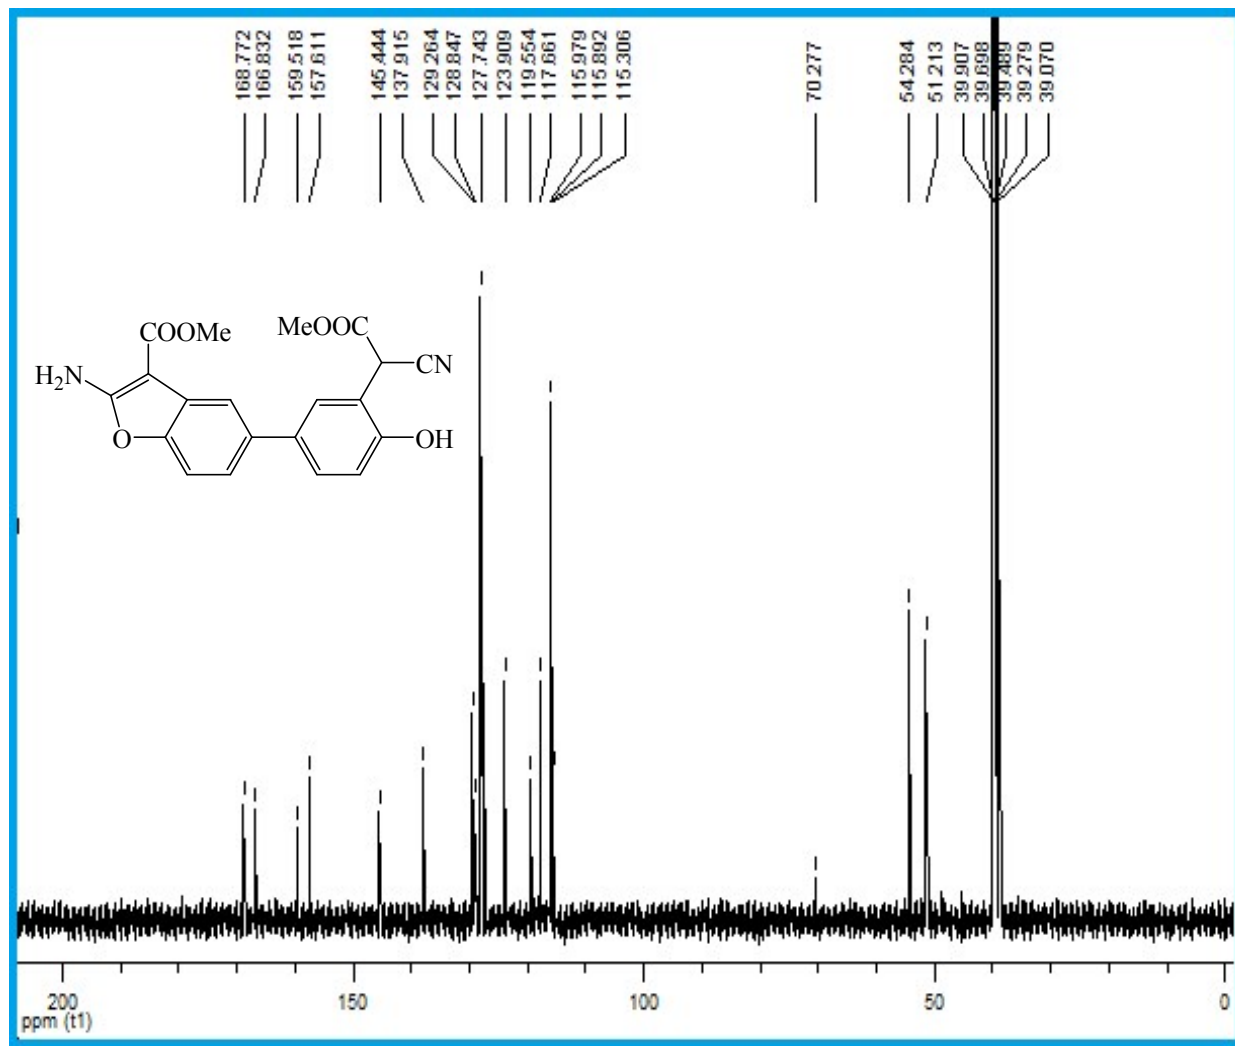

### Expanded $^{13}\text{C}$ NMR spectrum of 4b

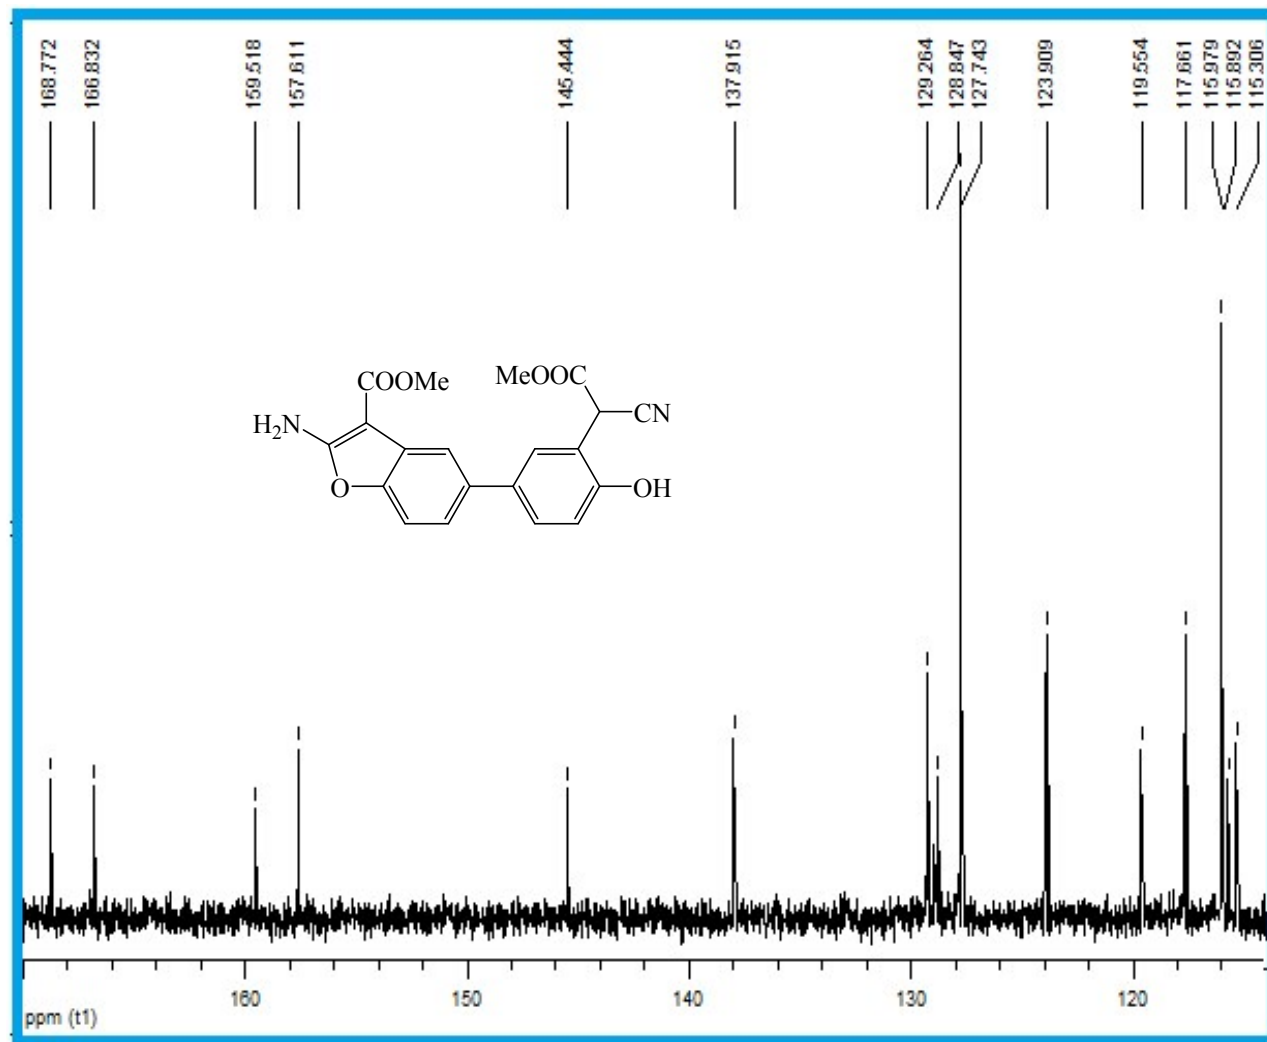

### FT-IR spectrum of 4c

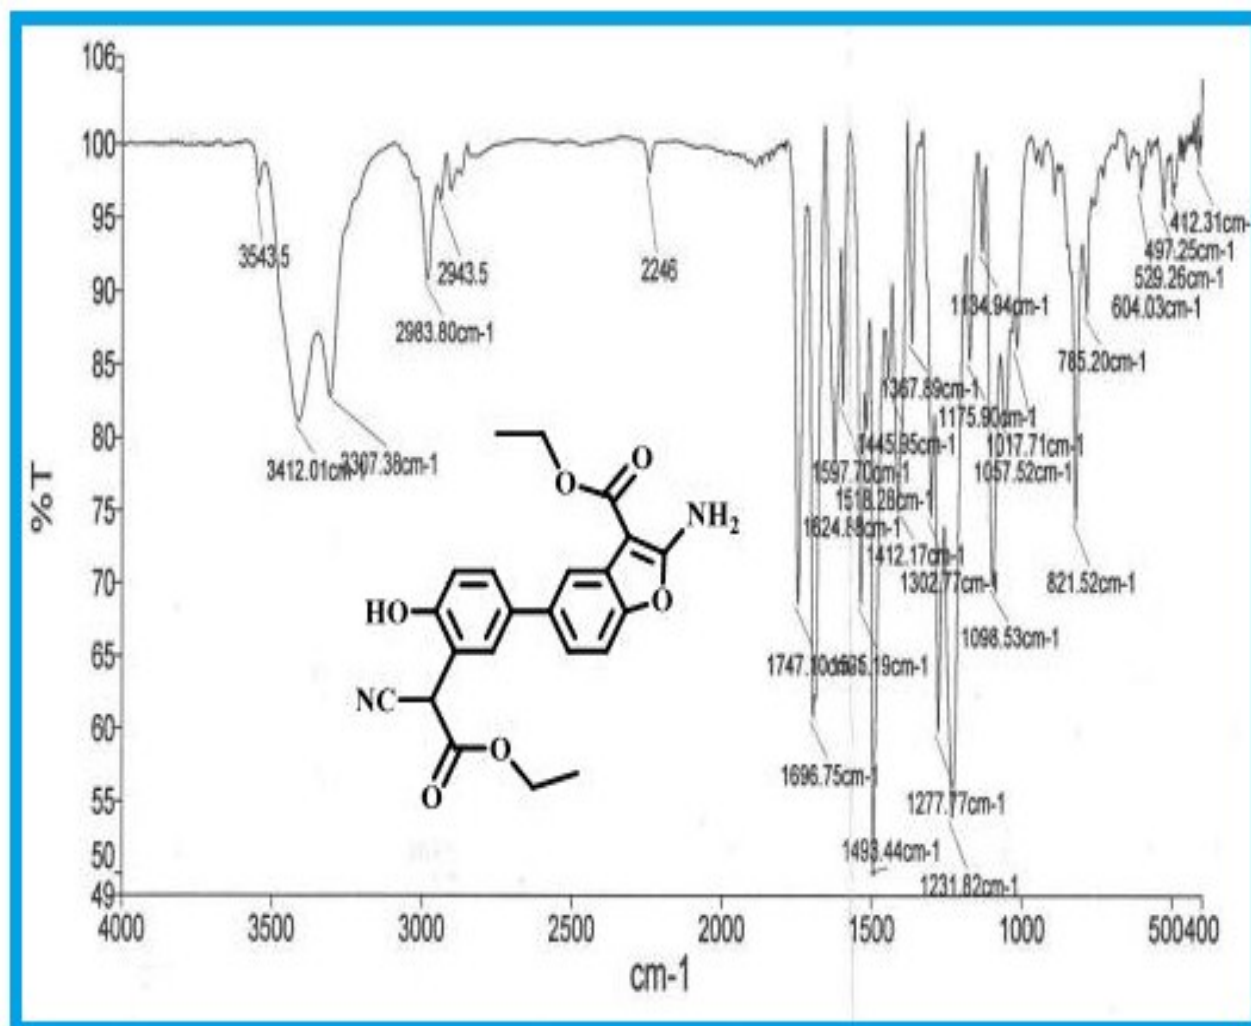

### MS spectrum of 4c

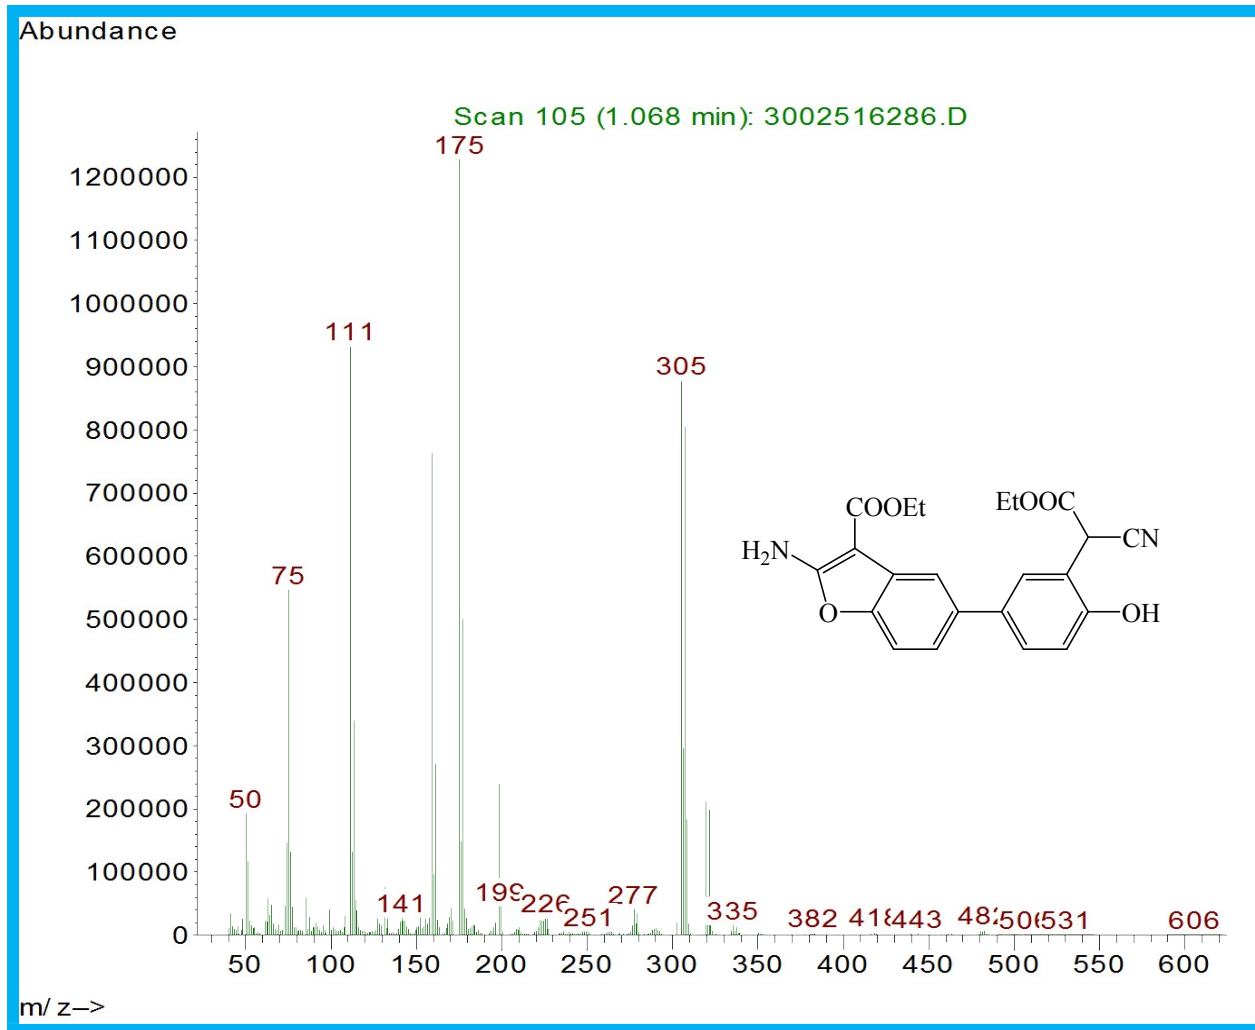

<sup>1</sup>H NMR spectrum of 4c

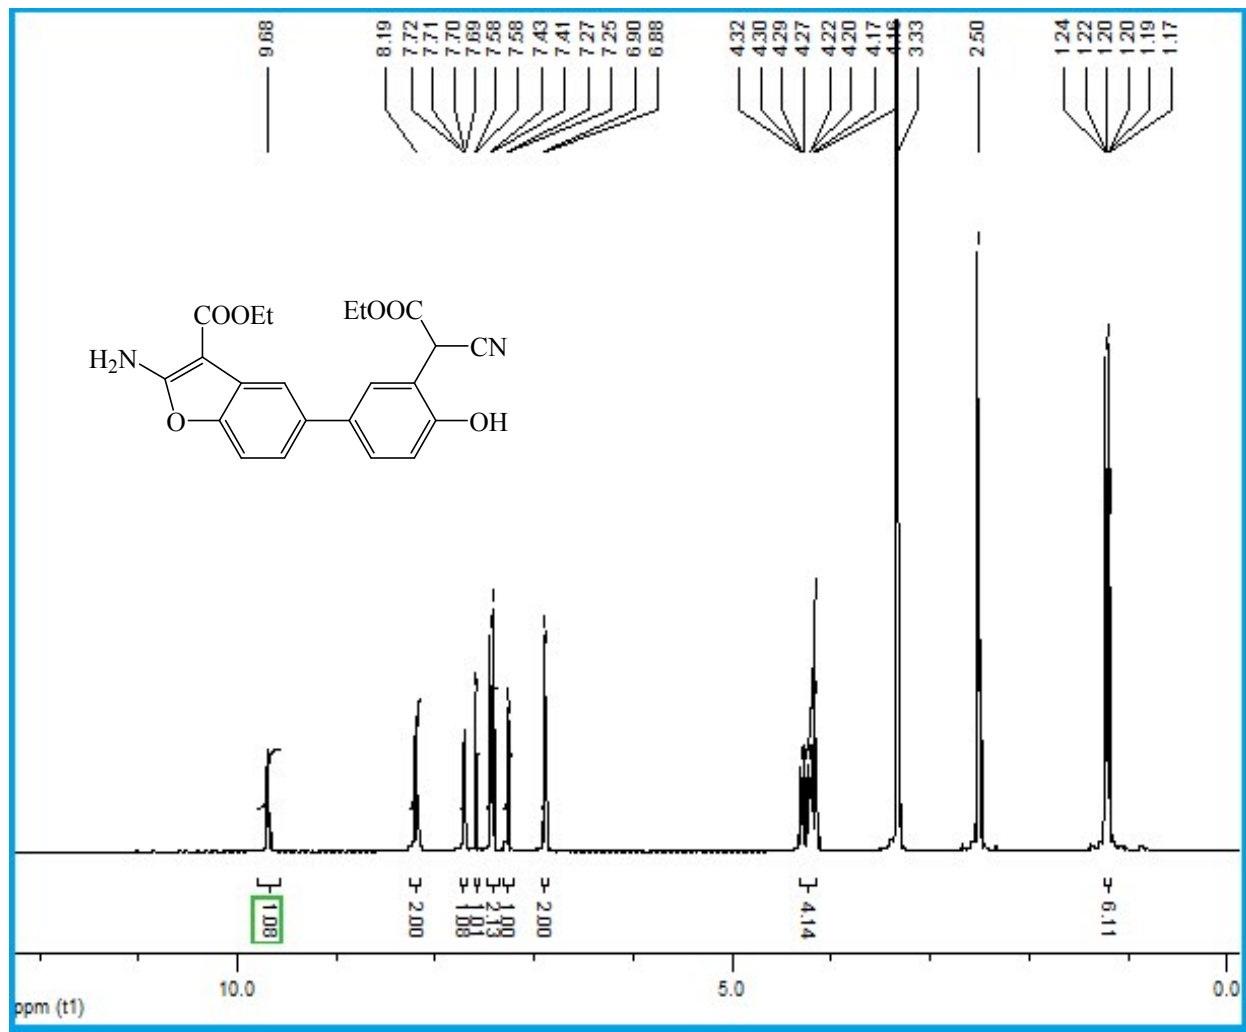



Expanded  $^1\text{H}$  NMR spectrum of 4c

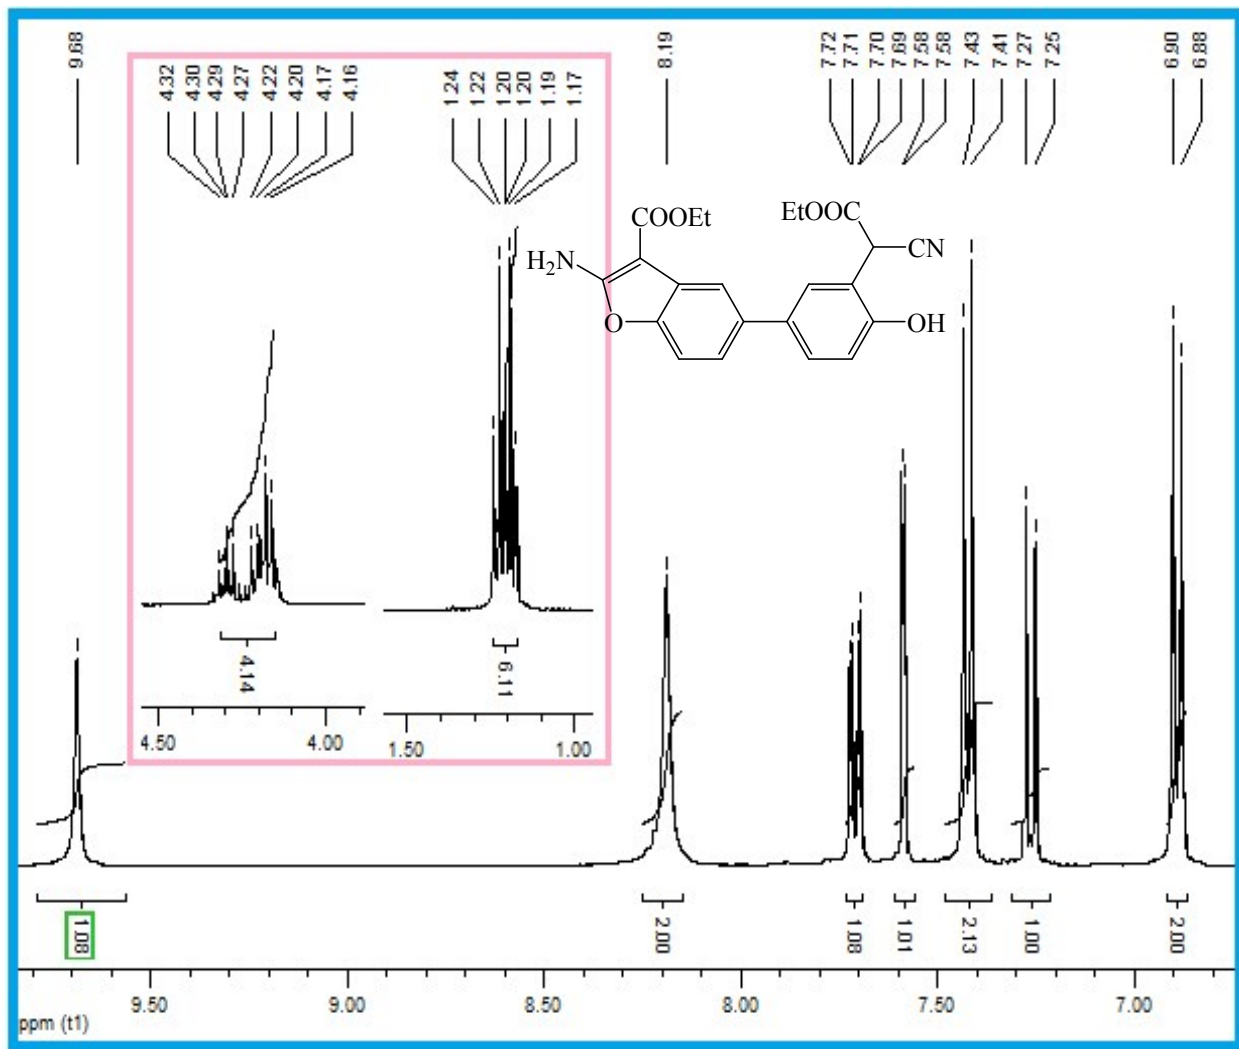

<sup>1</sup>H NMR spectrum of 4c (with D<sub>2</sub>O)

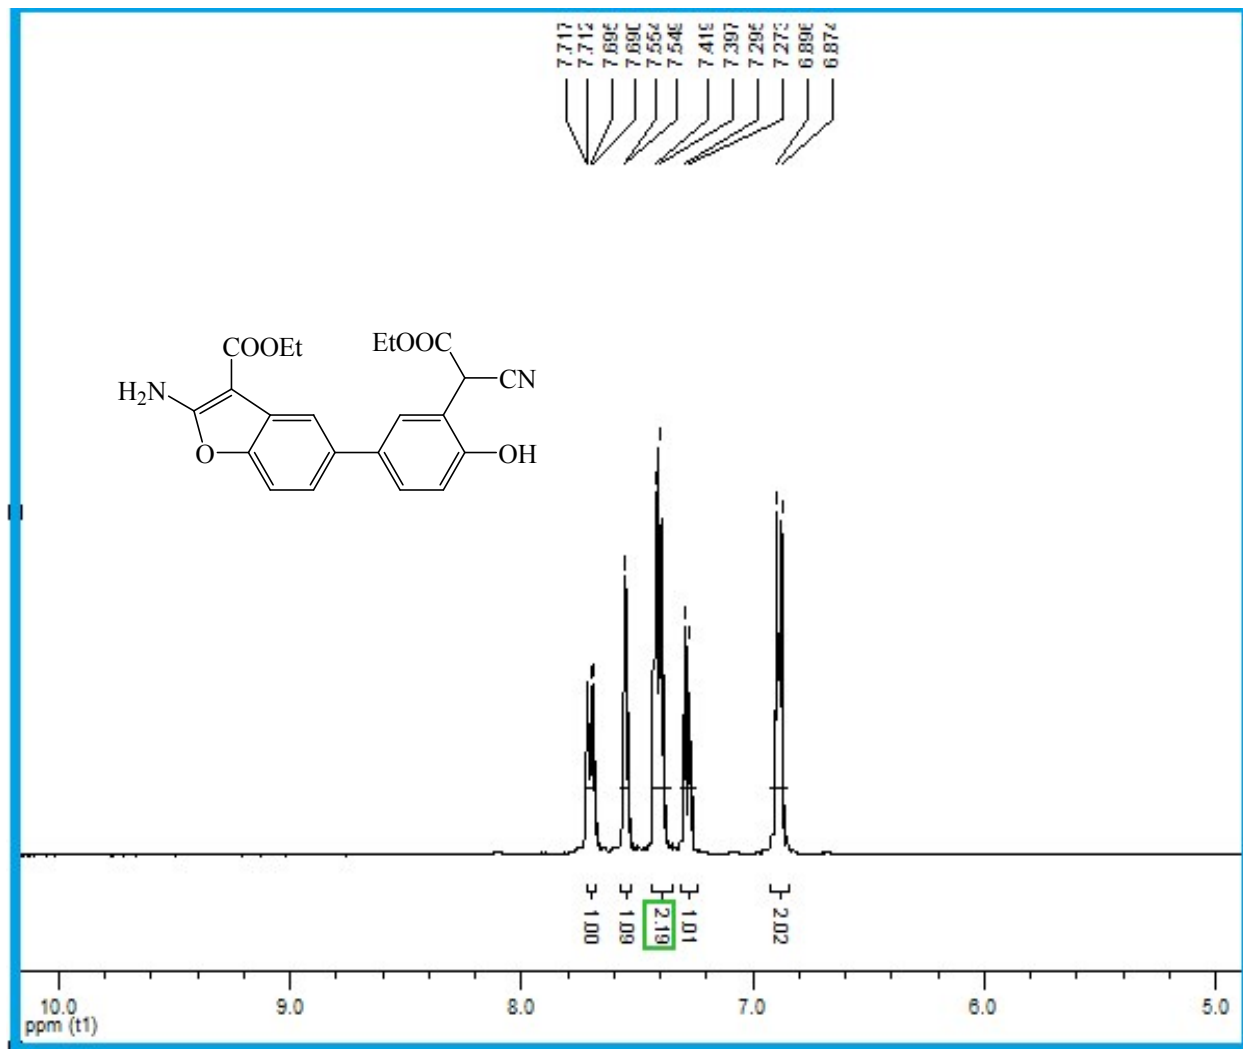

<sup>13</sup>C NMR spectrum of 4c

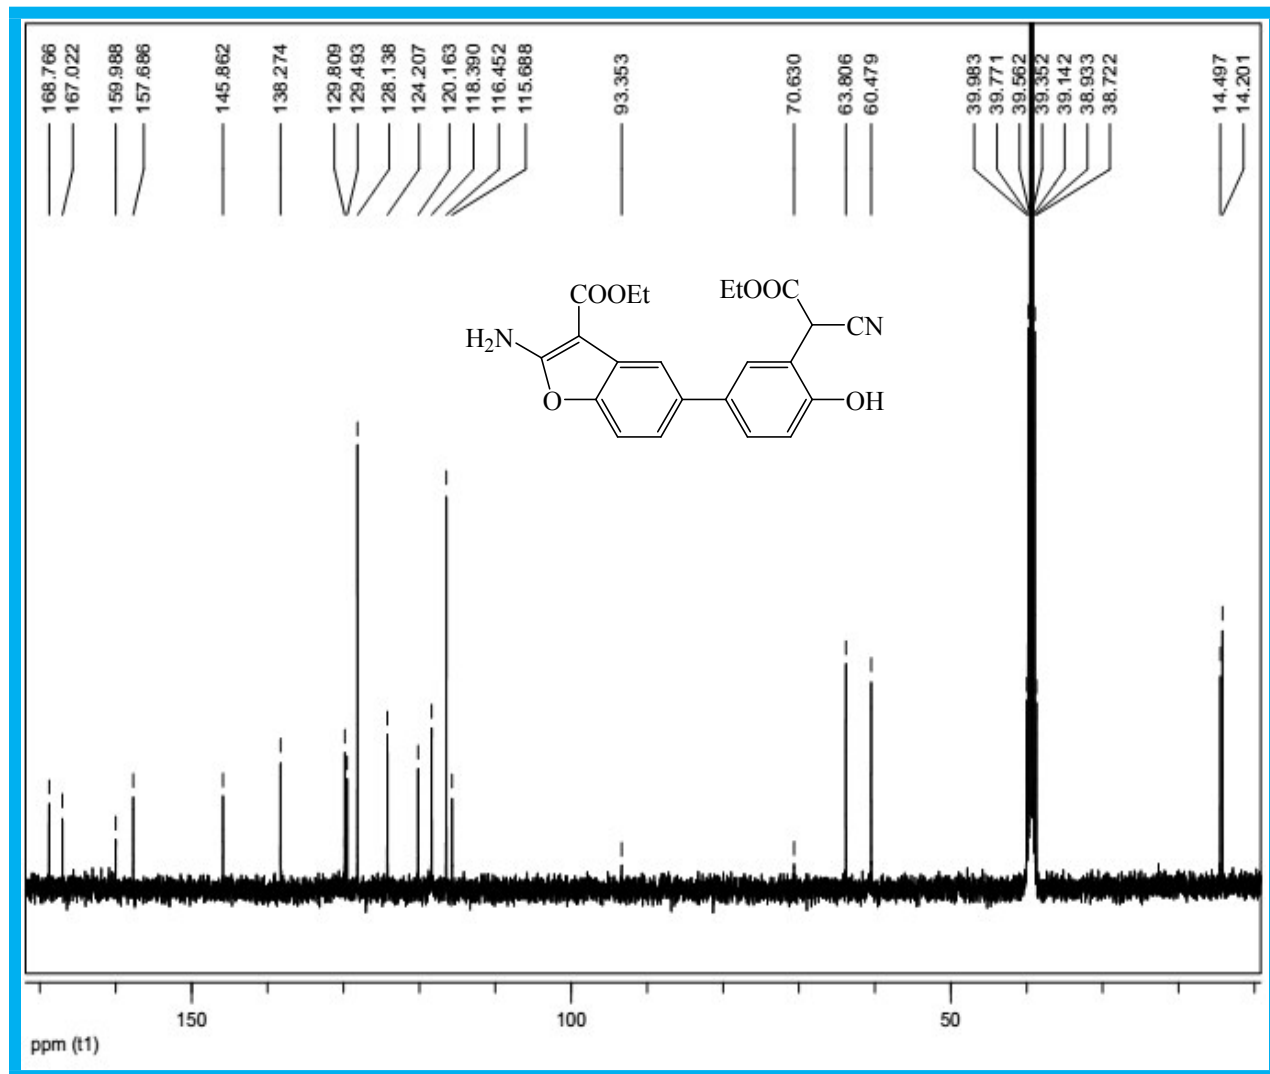

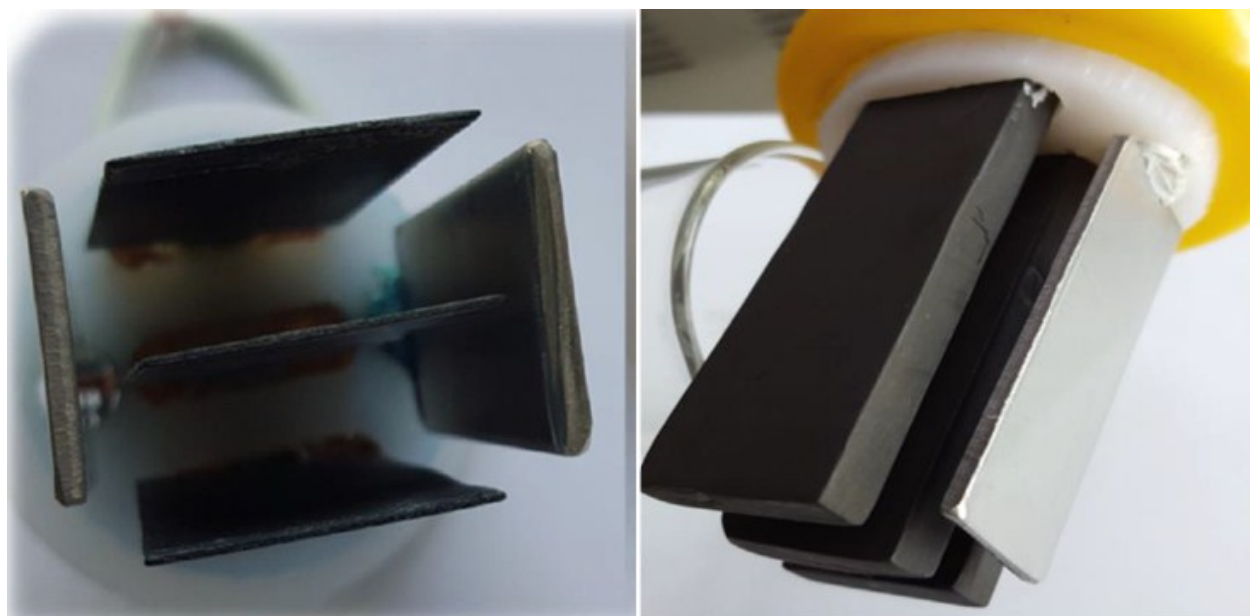

**Fig. S1.** The cell designed for electrochemical synthesis
